# Supplementary material
Source: publisher figshare collection journal article supplement (https://geolsoc.figshare.com/ndownloader/files/25386862)
Supplement: Supplementary file 1 [file 25386862]

## Sheet: Sheet1
Sample	Area	Magma type	Type	Reference	SiO2	TiO2	Al2O3	FeOtot	MnO	MgO	CaO	Na2O	K2O	P2O5	LOI	Cr	Ni	Sc	V	Co	Cu	Zn	Ga	Ta	Nb	Hf	Zr	Y	Ba	Rb	Sr	Cs	U	Th	Pb	La	Ce	Pr	Nd	Sm	Eu	Gd	Tb	Dy	Ho	Er	Tm	Yb	Lu
Z.1801.1	Ahlmannryggen	AR1	Group 1	Riley et al. 2005	52.4304	1.58253	12.1534	11.3265	0.196523	8.86424	10.3433	2.12038	0.796437	0.19	1.67	668	294	24.4	258.2	52.5	94.9	92.9	17.5	0.45	7.2	3.12	122	27.2	310	14.1	248	0.3	0.57	1.86	4.18	14.7	31.79	4.35	18.87	4.49	1.4	5.2	0.85	4.88	0.95	2.46	0.39	2.21	0.34
Z.1801.2	Ahlmannryggen	AR1	Group 1	Riley et al. 2005	52.3911	1.57287	12.138	11.6294	0.175913	8.44384	10.5031	2.35931	0.600175	0.186261	2.62	708	318	24.3	260.1	54.9	98.3	96.2	17.4	0.44	7.2	3.17	123	27.4	313	25.5	340	1.1	0.65	1.86	4.13	14.83	32.07	4.39	19	4.54	1.42	5.34	0.86	4.94	0.97	2.51	0.4	2.25	0.35
Z.1814.1	Ahlmannryggen	AR1	Group 1	Riley et al. 2005	50.8189	2.30902	13.6812	14.1592	0.203438	5.65558	9.42937	2.72607	0.793409	0.223782	0.64	75	84	29.6	424.8	51.8	204.7	124.4	22.6	0.6	9.6	4.32	164	30.2	267	12.6	288	0.2	0.46	2.47	4.45	17.42	38.73	5.6	24.64	5.95	1.94	6.42	0.99	5.6	1.09	2.78	0.43	2.45	0.38
Z.1814.2	Ahlmannryggen	AR1	Group 1	Riley et al. 2005	51.4025	2.26686	13.7339	13.8186	0.204221	5.68756	9.45544	2.59361	0.622875	0.214432	0.97	77	81	30.1	418.6	51	201.2	123.9	22.6	0.59	9.5	4.24	163	29.3	208	17.5	281	0.4	0.45	2.38	4.66	16.5	36.74	5.31	23.28	5.52	1.79	6.07	0.94	5.36	1.07	2.64	0.41	2.29	0.36
Z.1814.3	Ahlmannryggen	AR1	Group 1	Riley et al. 2005	50.9715	2.31501	13.6213	14.107	0.186027	5.49814	9.73543	2.94543	0.403059	0.217032	1.1	78	86	30.8	420.4	51.5	202.3	123.8	22.5	0.59	9.3	4.17	160	29.5	405	3.3	299	1.3	0.45	2.38	4.54	17.22	38.07	5.45	23.78	5.71	1.87	6.16	0.96	5.49	1.08	2.76	0.42	2.35	0.37
Z.1814.4	Ahlmannryggen	AR1	Group 1	Riley et al. 2005	55.5285	2.25466	14.5855	10.0629	0.159622	5.4471	8.6595	1.91546	1.267	0.119717	0.56	76	83	30.3	424.8	52.2	205.5	124.4	22.7	0.6	9.4	4.37	163	30.1	314	12.9	356	7.8	0.46	2.42	4.22	17.54	38.59	5.51	24.51	5.86	1.9	6.43	0.99	5.62	1.1	2.76	0.43	2.41	0.37
Z.1805.1	Ahlmannryggen	AR2	Group 2	Riley et al. 2005	51.9511	2.25518	14.4331	12.3966	0.205016	5.58669	10.138	2.42944	0.358778	0.246019	1.3	84	64	32	327.2	44.3	100.2	118.9	19.5	0.77	11.9	4.05	159	34.4	115	6.5	181	0.6	0.49	1.35	11.47	12.8	30.62	4.57	21.35	5.48	1.79	6.46	1.04	5.99	1.22	3.25	0.53	3.08	0.49
Z.1808.1	Ahlmannryggen	AR2	Group 2	Riley et al. 2005	49.5927	2.47394	13.9121	14.5299	0.217376	5.62072	10.61	2.55675	0.238078	0.24843	1.23	62	43	33.6	341.6	44.8	76.6	131.9	19.4	0.75	11.7	3.91	155	34.2	91	3.7	196	0.4	0.43	1.22	3.93	12.08	29.34	4.4	20.85	5.34	1.81	6.38	1.01	5.91	1.19	3.19	0.52	3.02	0.49
Z.1810.1	Ahlmannryggen	AR2	Group 2	Riley et al. 2005	50.4652	2.34154	14.1103	13.5667	0.213793	6.21017	9.95663	2.54515	0.34614	0.244334	0.5	84	66	33.1	336	46.3	97.2	118	19.6	0.77	11.9	3.92	153	34.3	100	6.9	213	0.4	0.44	1.22	2	12.34	29.87	4.47	21.03	5.46	1.78	6.38	1.02	5.98	1.2	3.2	0.52	3	0.48
Z.1822.1	Ahlmannryggen	AR2	Group 2	Riley et al. 2005	50.3922	2.4119	14.0797	14.2641	0.237067	5.84422	10.1011	2.21606	0.195838	0.257682	1.74	72	62	45	423.6	51.6	104.9	149	21.4	0.79	12.1	4.17	159	36	85	3.7	208	2.9	0.41	1.1	3.83	12.56	30.59	4.79	22.45	5.84	1.83	6.56	1.07	6.43	1.34	3.5	0.56	3.25	0.52
Z.1823.1	Ahlmannryggen	AR2	Group 2	Riley et al. 2005	49.7283	2.54938	13.6069	14.9797	0.225247	5.81546	9.63441	2.69272	0.511924	0.255962	0.24	71	62	44.7	430.2	51.9	106.8	141.2	22.1	0.84	12.7	4.49	167	37.9	129	11.9	225	0.6	0.42	1.17	2.59	13.03	31.92	4.99	23.44	6.03	2	6.9	1.12	6.69	1.37	3.6	0.57	3.34	0.54
Z.1828.1	Ahlmannryggen	AR2	Group 2	Riley et al. 2005	50.3417	2.33623	14.4273	13.4058	0.215179	5.94304	10.4823	2.39771	0.204933	0.245919	1.42	90	69	35.1	343.4	46.4	99.1	110.4	20.1	0.75	11.7	4.04	154	34.6	109	3.4	200	1.9	0.45	1.26	5.96	13.13	31.47	4.84	22.51	5.76	1.86	6.36	1.04	6.11	1.25	3.35	0.53	3.12	0.5
Z.1828.3	Ahlmannryggen	AR2	Group 2	Riley et al. 2005	50.7467	2.24461	14.44	13.1327	0.206876	6.03044	10.1473	2.35839	0.455128	0.237908	2.06	91	71	36.2	355.7	47.6	93.9	92.6	20	0.74	11.4	4	150	33.8	165	13.8	197	1.9	0.43	1.18	3.34	12.56	30.52	4.71	21.98	5.59	1.8	6.27	1.01	6.01	1.23	3.25	0.52	3.04	0.49
Z.1828.4	Ahlmannryggen	AR2	Group 2	Riley et al. 2005	50.9032	2.3412	14.1699	12.9156	0.173801	5.81721	10.3871	2.66835	0.378272	0.245366	1.57	91	71	35.3	349.3	46.5	94.3	85.1	20.3	0.75	11.6	4.02	155	34.5	196	9.5	193	1.7	0.44	1.21	2.98	12.39	30.8	4.79	22.26	5.7	1.83	6.3	1.03	6.09	1.24	3.26	0.53	3.07	0.49
Z.1828.5	Ahlmannryggen	AR2	Group 2	Riley et al. 2005	51.1148	2.28079	13.7368	13.2881	0.208292	5.88424	10.7999	2.27038	0.177048	0.239536	1.9	90	70	35.2	350.7	47.3	96.2	100	20	0.76	11.6	4.08	155	34.7	100	3.4	193	2.3	0.43	1.2	4.73	12.8	31.15	4.84	22.48	5.75	1.85	6.36	1.03	6.15	1.25	3.33	0.54	3.16	0.5
Z.1830.1	Ahlmannryggen	AR2	Group 2	Riley et al. 2005	50.292	2.68306	13.5177	14.9921	0.235536	5.30467	9.63648	2.63186	0.440349	0.266258	0.38	50	53	38.3	404.5	50	110.6	125.9	22.1	0.87	13.5	4.75	177	39.8	123	7.7	214	0.5	0.45	1.25	2.21	14.54	35.66	5.54	26.05	6.67	2.2	7.41	1.21	7.14	1.45	3.86	0.62	3.59	0.58
Z.1835.2	Ahlmannryggen	AR2	Group 2	Riley et al. 2005	50.6538	2.55084	13.6045	14.07	0.217754	5.869	9.99596	2.47825	0.311078	0.248862	1.34	73	65	40.1	406.8	52.3	107.7	105.4	21.6	0.79	12.3	4.23	164	37.3	128	17.5	220	25.7	0.39	1.1	2.49	13.1	32.17	5.06	23.83	6.13	1.99	6.66	1.1	6.46	1.32	3.49	0.56	3.25	0.52
Z.1835.3	Ahlmannryggen	AR2	Group 2	Riley et al. 2005	48.7196	2.61811	12.9146	15.3824	0.248358	5.92955	10.8243	2.69055	0.434627	0.23801	1.12	76	67	40.8	415.8	53.2	103	100.5	21.9	0.81	12.6	4.34	168	37.9	146	19	223	21.4	0.4	1.12	2.6	13.35	33.02	5.18	24.33	6.21	2.02	6.77	1.12	6.64	1.34	3.57	0.58	3.28	0.53
Z.1835.4	Ahlmannryggen	AR2	Group 2	Riley et al. 2005	48.0687	2.49093	14.3691	15.5041	0.195569	5.82588	10.8489	2.16155	0.277913	0.257327	1.76	75	69	40.2	410	52.9	98.6	107.8	22.2	0.79	12.1	4.23	161	36.7	153	6.7	189	1.2	0.39	1.09	3.04	13.28	32.46	5.06	23.62	6.06	2.04	6.6	1.09	6.5	1.31	3.48	0.56	3.22	0.51
Z.1839.1	Ahlmannryggen	AR2	Group 2	Riley et al. 2005	50.6096	2.52637	13.5767	14.545	0.225936	5.6792	9.68442	2.50583	0.400522	0.246475	1.02	64	63	40.1	415.5	53.1	106.7	110.6	22.4	0.83	12.8	4.45	172	38.5	110	8.4	217	3	0.41	1.15	1.9	13.75	33.93	5.32	25.01	6.41	2.09	6.91	1.14	6.78	1.36	3.62	0.59	3.35	0.54
Z.1839.2	Ahlmannryggen	AR2	Group 2	Riley et al. 2005	50.563	2.50322	13.3782	14.3088	0.25967	5.65043	10.5011	2.29549	0.290831	0.249283	1.57	70	64	39.8	404.9	52.1	100.1	97.1	21.4	0.78	12.2	4.17	163	37	113	7.8	197	2.8	0.39	1.1	2.37	12.99	32.2	5.08	23.92	6.17	1.97	6.68	1.1	6.48	1.32	3.49	0.55	3.24	0.51
Z.1803.1	Ahlmannryggen	ARD	Group 3	Riley et al. 2005; Heinonen et al. 2014	49.1514	4.06462	12.0211	12.9561	0.172746	8.65764	10.4562	1.83924	0.436947	0.243877	0.69	479	390	29.6	344.7	57.9	146.2	143.7	21	0.68	10	7.37	275	43.7	112	11.6	257	1.1	0.34	1.15	2.13	10.98	30.82	5.39	29.28	9.36	3.15	10.98	1.68	8.88	1.62	3.85	0.56	3.04	0.44
Z.1803.2	Ahlmannryggen	ARD	Group 3	Riley et al. 2005	49.3567	4.00272	11.9063	12.4087	0.162961	9.52301	10.0832	1.89442	0.417586	0.244441	0.66	501	411	30	344.7	59	145.3	138.7	20.6	0.68	9.9	7.28	271	43.4	104	11.3	246	1.1	0.34	1.18	2.08	10.97	30.59	5.34	29	9.24	3.1	10.85	1.64	8.77	1.6	3.81	0.55	3.03	0.44
Z.1803.3	Ahlmannryggen	ARD	Group 3	Riley et al. 2005	49.6755	3.50506	9.9515	12.8552	0.174228	11.4478	10.1667	1.66029	0.348456	0.215223	1.07	705	576	29.4	311.7	64.7	122.3	127	18.3	0.57	8.4	6.16	232	37.7	84	8.8	219	1	0.3	1.03	1.81	9.26	25.85	4.5	24.54	7.85	2.64	9.35	1.41	7.57	1.37	3.25	0.47	2.58	0.38
Z.1803.4	Ahlmannryggen	ARD	Group 3	Riley et al. 2005	49.2113	4.24707	12.7716	12.6867	0.172316	7.73393	10.5619	1.89547	0.476402	0.243269	0.25	397	251	29.3	351.5	50.5	157.3	140.4	21.9	0.72	10.6	7.68	289	46	120	8.2	275	1.8	0.36	1.23	2.17	11.58	32.26	5.63	30.8	9.78	3.3	11.53	1.74	9.24	1.68	3.99	0.58	3.17	0.46
Z.1803.5	Ahlmannryggen	ARD	Group 3	Riley et al. 2005; Heinonen et al. 2014	48.8519	3.60542	10.5405	13.041	0.173632	11.7151	9.89703	1.67504	0.275769	0.2247	1.05	676	578	28.3	311.8	64.8	128.2	131.6	18.4	0.59	8.7	6.3	238	38.2	102	11	237	4.6	0.31	1.06	1.9	9.61	26.7	4.65	25.15	7.97	2.71	9.47	1.44	7.68	1.4	3.34	0.49	2.64	0.39
Z.1812.1	Ahlmannryggen	ARD	Group 3	Riley et al. 2005	47.3867	4.1427	8.46191	14.0416	0.197271	13.9647	9.98816	1.36013	0.207654	0.249185	1.69	1006	619	29.7	302	67.1	121.8	132.9	16.2	0.51	7.4	6.76	258	37.7	39	3.7	201	0.3	0.16	0.44	0.87	6.64	21.83	4.28	24.9	8.2	2.78	9.83	1.46	7.68	1.38	3.26	0.47	2.51	0.36
Z.1812.2	Ahlmannryggen	ARD	Group 3	Riley et al. 2005	48.823	4.31635	9.31963	13.4782	0.174294	11.5957	10.4987	1.35335	0.1948	0.246063	0.96	889	432	30.9	327.8	61.6	134.6	137.6	17.8	0.57	8.2	7.56	288	41.5	42	3.8	215	0.3	0.18	0.48	0.83	7.44	24.42	4.77	27.92	9.21	3.08	10.81	1.61	8.51	1.53	3.6	0.52	2.78	0.41
Z.1812.3	Ahlmannryggen	ARD	Group 3	Riley et al. 2005; Heinonen et al. 2014	49.167	4.12105	9.48659	13.0702	0.173411	11.9143	10.3026	1.33628	0.183611	0.244815	1.05	906	467	31.4	327.3	64.8	132.3	150.7	17.8	0.58	8.2	7.68	295	41.1	76	3.6	215	0.4	0.19	0.51	1.15	7.33	24.05	4.69	27.47	9.02	3.04	10.75	1.62	8.47	1.52	3.54	0.51	2.76	0.4
Z.1812.5	Ahlmannryggen	ARD	Group 3	Riley et al. 2005	48.097	4.71137	10.2216	13.5565	0.174116	10.2011	11.1127	1.47486	0.204842	0.245811	1.23	711	336	32.8	358.6	58.8	150.1	146.8	19.7	0.64	9	8.23	316	45.4	66	3.5	235	0.2	0.2	0.56	1.51	8.12	26.66	5.23	30.43	10	3.38	11.82	1.77	9.31	1.67	3.94	0.57	3.03	0.44
Z.1813.1	Ahlmannryggen	ARD	Group 3	Riley et al. 2005; Heinonen et al. 2014	47.112	3.64644	9.99124	13.8086	0.177113	12.7	10.283	1.71904	0.333389	0.229205	1.93	728	597	31.5	338.1	67.1	140.6	128.6	18.9	0.66	9.6	6.19	228	37.4	79	6.5	282	1.6	0.23	0.67	1.33	9.96	27.54	4.82	25.3	7.84	2.7	9.18	1.4	7.45	1.4	3.29	0.48	2.57	0.38
Z.1816.1	Ahlmannryggen	ARD	Group 3	Riley et al. 2005; Heinonen et al. 2014	48.6613	3.34001	9.38285	12.8721	0.164431	14.7269	8.99232	1.42849	0.205539	0.226093	1.89	803	500	37.4	374.7	65.7	145.5	146.5	19.5	0.59	8.4	8.05	295	43.9	38	2.4	246	0.4	0.15	0.42	0.79	7.47	24.84	5.02	29.64	9.91	3.35	11.36	1.73	9.1	1.67	3.88	0.57	3.01	0.43
Z.1816.2	Ahlmannryggen	ARD	Group 3	Riley et al. 2005; Heinonen et al. 2014	47.2948	3.90832	8.31557	13.674	0.176706	14.8329	10.145	1.26812	0.145522	0.239073	2.61	966	769	35	333.4	74.9	130.5	149.7	16.9	0.51	7.3	6.8	253	38	33	2.1	218	0.6	0.14	0.35	1.03	6.32	21	4.25	24.97	8.42	2.81	9.62	1.46	7.79	1.42	3.34	0.49	2.58	0.37
Z.1816.3	Ahlmannryggen	ARD	Group 3	Riley et al. 2005; Heinonen et al. 2014	45.9359	3.26107	8.16773	11.0782	0.180613	21.6836	7.69612	1.25426	0.551873	0.190647	1.28	822.911	727.084	32.062	315.612	71.333	128.198	127.189	17.566	0.55	7.907	5.76	215.61	35.297	53.266	3.983	229.518	0.672	0.176	0.547	0.978	7.475	22.116	4.081	22.481	7.182	2.479	8.439	1.308	7.096	1.307	3.086	0.443	2.391	0.354
Z.1817.2	Ahlmannryggen	ARD	Group 3	Riley et al. 2005; Heinonen et al. 2014	47.6	3.94792	10.4528	13.289	0.173872	12.2733	10.1357	1.60576	0.27615	0.245466	0.77	683	578	36	368.5	68	154.4	139.9	20.5	0.69	10.1	6.93	262	42	65	6.2	283	0.5	0.22	0.65	1.1	9.26	27.48	5.11	27.93	8.69	3.01	10.23	1.56	8.41	1.54	3.58	0.52	2.81	0.42
Z.1834.3	Ahlmannryggen	ARD	Group 3	Riley et al. 2005; Heinonen et al. 2014	47.5125	4.93015	11.6596	12.8328	0.17281	9.76882	10.7447	1.81958	0.284627	0.274462	0.22	558	291	33.9	412.1	63.2	134.3	125.8	20.6	0.83	11.8	7.28	273	37.4	112	4	446	2	0.23	0.77	1.37	11.54	33.22	6	32.13	9.54	3.19	9.95	1.47	7.82	1.4	3.29	0.47	2.48	0.37
Z.1653.2	Ahlmannryggen	ARE	Group 4	Riley et al. 2005	49.1954	4.16496	14.7148	13.0755	0.183299	5.56007	9.15477	2.59674	0.987779	0.366598	0.93	125	85	28.3	342	44.1	268	145	24.5	2.21	34.4	9.17	373	44.4	797	41.6	549	1.7	0.94	4.11	5.11	41.76	93.21	13.04	58.09	12.28	3.68	11.8	1.67	8.83	1.62	3.91	0.59	3.29	0.5
Z.1804.3	Ahlmannryggen	ARE	Group 4	Riley et al. 2005; Heinonen (pers.com 2019)*	50.3965	3.96734	9.61593	11.7241	0.174276	11.533	9.67744	1.70175	0.912386	0.297294	0.99	702	419	26.5	283.7	53.4	139.8	120.5	16.4	1.52	22.5	8.68	343	33.4	314	12	509	1.1	0.63	2.55	4.29	26.8	66.01	10.15	47.38	10.89	3.27	10.42	1.41	7.05	1.23	2.89	0.42	2.25	0.33
Z.1825.1	Ahlmannryggen	ARE	Group 4	Riley et al. 2005	49.6085	5.4729	9.76414	11.9569	0.15548	9.24588	10.4794	2.10416	0.860323	0.352421	1.62	652	226	38.1	362.5	49.3	160.4	150.7	20	2	29.5	13.77	517	46.7	512	30.4	817	4.8	0.73	3.58	4.44	42.19	103.43	16.24	75.7	16.98	5.02	15.3	2.07	10.4	1.82	4.11	0.59	3.07	0.45
Z.1825.3	Ahlmannryggen	ARE	Group 4	Riley et al. 2005; Heinonen (pers.com 2019)*	49.4503	5.03755	9.63304	11.8223	0.154211	11.8742	9.37602	1.72716	0.56544	0.359825	1.85	733	425	36.1	340.9	56.7	151.4	149	18.8	1.83	27.7	12.76	481	43.4	465	25.5	774	2.5	0.52	3.28	4.02	38.75	94.63	14.94	68.86	15.57	4.58	14.02	1.88	9.45	1.67	3.75	0.53	2.86	0.41
Z.1826.1	Ahlmannryggen	ARE	Group 4	Riley et al. 2005; Heinonen (pers.com 2019)*	49.3273	4.39082	8.81248	11.9266	0.154244	14.4064	8.7405	1.47046	0.431884	0.339337	2.05	834	666	34.2	319.3	66.4	140.3	140.6	17	1.5	22	10.82	413	38.6	337	21.9	584	5.1	0.51	2.08	2.96	27.68	71.15	11.69	55.57	12.95	3.94	12.09	1.67	8.4	1.47	3.32	0.47	2.46	0.37
Z.1826.2	Ahlmannryggen	ARE	Group 4	Riley et al. 2005	49.2754	4.43087	8.64535	11.97	0.154565	14.7661	8.66596	1.32926	0.422478	0.340043	1.91	865	675	34.8	318.2	66.4	137.4	137.2	16.5	1.44	21.1	10.65	408	38.2	319	19.8	569	4.3	0.94	2.04	2.82	27.14	70.24	11.57	55.24	13.11	3.95	11.93	1.67	8.38	1.49	3.36	0.47	2.52	0.37
Z.1831.5	Ahlmannryggen	ARE	Group 4	Riley et al. 2005	56.3327	4.13168	10.247	9.3497	0.143889	5.9303	7.91391	1.83973	3.70001	0.411112	1.21	390	160	25.6	260.7	40	95.9	91.7	18.7	1.94	30.4	14.41	568	35.6	1352	59.2	557	0.3	0.86	4.86	7.67	67	150.04	22.46	96.61	17.97	4.63	13.26	1.68	8.07	1.36	3.05	0.43	2.32	0.34
Z.1833.1	Ahlmannryggen	ARE	Group 4	Riley et al. 2005	47.9435	4.1262	9.05878	11.8733	0.157089	15.3947	8.51421	1.81176	0.722608	0.397958	3.75	859	787	27.3	281.8	71.2	133.1	103.3	17.5	1.8	27.7	12.18	479	34.9	713	31.1	983	16	0.84	4.58	5.77	60.92	140.38	20.64	85.58	15.65	4.26	11.94	1.59	7.77	1.32	3.03	0.42	2.23	0.33
Z.1833.2	Ahlmannryggen	ARE	Group 4	Riley et al. 2005; Heinonen (pers.com 2019)*	47.7088	4.24031	8.41733	12.3669	0.168769	15.2314	8.8287	1.90919	0.74891	0.379729	3.33	918	789	28.3	283.4	71.1	132.7	100.6	17.3	1.77	27.5	11.98	477	34.8	702	33.4	1005	14.3	0.85	4.5	5.64	59.79	137.87	20.27	84.5	15.41	4.18	11.69	1.55	7.64	1.3	2.96	0.42	2.18	0.32
Z.1838.1	Ahlmannryggen	ARE	Group 4	Riley et al. 2005; Heinonen (pers.com 2019)*	48.2649	4.15485	7.82027	11.9464	0.156197	16.4944	8.05978	1.89519	0.833052	0.374873	2.28	965	885	27	274.1	72.2	122.4	95.7	15.8	2.33	32.6	11.17	444	34.6	561	54	775	2.1	0.98	3.73	4.82	47.5	111.49	16.69	72.24	14.55	3.98	11.4	1.52	7.53	1.29	2.96	0.42	2.22	0.32
A309	Ahlmannryggen	ARE	Group 4	Riley et al. 2005	50.8771	4.29548	13.8185	11.9325	0.182355	5.06543	9.64457	2.65428	1.01309	0.516673	1.59	127	76	32.9	357		266	125	21	2.13	31.7		344	45.9	947	46.9	615	1.7	0.86	3.8	4.81	43.18	92.43	11.72	52.49	13.01	3.94	11.96	1.78	9.91	1.79	4.34	0.57	3.24	0.48
10-KHG-90	Vestfjella	VF1	CT1-dike	Luttinen et al. 1998	53.39	1.34	15.13	10.09	0.17	6.37	9.34	2.86	1.05	0.26		222	69	30	268		36	92	21	0.4	7.92	3.3	137	26	527	18	494	0.19	0.34	1.3	4.51	18.49	37.82	4.68	20.11	5.22	1.65	5.29	0.87	5.12	1.01	2.57	0.34	2.16	0.31
28-KHG-90	Vestfjella	VF1	CT1-dike	Luttinen et al. 1998	51.42	1.65	15.91	10.35	0.15	6.65	10.67	2.27	0.7	0.22		85	114	31	341		94	93	22	0.44	8.52	3.63	138	24	327	8	363	0.19	0.26	1.44	4.04	19.91	40.19	4.93	21.33	5.57	1.83	5.41	0.85	5.02	0.98	2.46	0.34	2.01	0.29
30-KHG-90	Vestfjella	VF1	CT1-dike	Luttinen et al. 1998	51.35	1.64	15.59	11.42	0.16	6.45	10.17	2.25	0.76	0.22		79	121	32	328		96	94	24	0.42	8.33	3.63	140	24	300	9	364	0.29	0.23	1.36	4.14	19.1	39.16	4.86	20.85	5.29	1.78	5.31	0.85	4.99	0.96	2.37	0.32	1.93	0.29
AL/B19c-98	Vestfjella	VF1	CT1-dike	Luttinen et al. 2015	48.4296	2.08425	16.0634	12.8667	0.15365	6.01628	10.5759	2.79363	0.788203	0.228479		212	177	30.4693	353		234	94	23	0.422103	6.81766	4.30577	164	27.769	185.39	13.1491	341	0.365766	0.342765	1.8898	4.47578	16.8282	34.824	4.47106	20.8459	5.94691	2.04934	6.09276	0.974451	5.77969	1.08491	2.72568	0.363795	2.09697	0.311096
P3-KHG-90	Vestfjella	VF1	CT1-dike	Luttinen et al. 2015	51.64	1.49	14.84	11.88	0.15	7.65	9.57	2.07	0.53	0.2		325	177	33.2	324		108	84	20	0.31	5.39	3.07	116	23.01	236	10	339	0.53	0.25	1.16	2.95	14.35	29.92	3.78	17.05	4.67	1.63	4.8	0.76	4.51	0.86	2.2	0.3	1.82	0.28
P7-KHG-90	Vestfjella	VF1	CT1-dike	Luttinen et al. 2015	50.76	1.24	13.38	11.71	0.18	9.23	10.56	2.19	0.59	0.16		650	262	36.3	319		128	78	19	0.29	5.13	2.96	115	21.72	257	12	277	1.29	0.18	1.04	3.09	14.81	29.09	3.58	15.5	4.25	1.42	4.61	0.73	4.39	0.86	2.1	0.29	1.72	0.26
P10-KHG-90	Vestfjella	VF1	CT1-dike	Luttinen et al. 2015	50.47	2.2	14.96	12.92	0.18	5.82	9.64	2.56	0.89	0.35		136	102	29.8	361		137	111	26	0.5	9.04	4.59	173	32	381	19	427	2.12	0.43	2.12	5.69	22.99	48.87	6.38	27.95	7.31	2.37	7.1	1.14	6.39	1.23	3.12	0.42	2.45	0.37
AL/P1-98	Vestfjella	VF1	CT1-dike	Luttinen et al. 2015	49.7916	1.29865	13.5402	11.8872	0.18624	9.7449	11.1845	1.8322	0.382548	0.152012		930	319	29	327		155	91	21		5.4		106	28	174	4	241
AL/P5-98	Vestfjella	VF1	CT1-dike	Luttinen et al. 2015	49.2458	1.39737	13.7013	12.0628	0.191697	10.6139	9.80679	2.18938	0.635625	0.155375	0.43	648	327	32.8804	324		168	92	17	0.37344	6.61361	2.90489	109	22.4869	234.786	12.6595	277	1.06673	0.249811	1.56413	3.35592	14.1482	28.4158	3.48246	15.5055	4.27973	1.47135	4.55706	0.757249	4.59961	0.88103	2.22095	0.304183	1.7994	0.273271
AL/P6-98	Vestfjella	VF1	CT1-dike	Luttinen et al. 2015	52.9128	1.62863	15.3516	10.5582	0.158495	6.02483	10.038	2.22502	0.863593	0.238758	2.33	77	93	29.8817	303		77	94	20	0.532558	9.6603	3.98337	149	25.5015	356.208	9.95609	375	0.163519	0.41345	2.68184	6.0551	23.9761	47.149	5.56865	23.9113	5.75196	1.85118	5.54495	0.886535	5.03147	0.98208	2.47603	0.344088	2.05365	0.303771
AVL/P2-03	Vestfjella	VF1	CT1-dike	Luttinen et al. 2015	50.6974	1.32593	14.2112	10.9506	0.173013	9.10937	10.7664	1.84536	0.757309	0.163468		643.5	227.6	32.7	324.8		149.7	83.4	21.5	0.288533	5.29652	3.12999	116.264	21.8681	251.474	19.9131	259.8	0.423395	0.200318	1.34934	3.90033	15.3823	32.2896	4.16779	17.6324	4.35131	1.46669	4.66365	0.772834	4.5568	0.890639	2.25984	0.309045	1.86377	0.275273
AL/PD7-98	Vestfjella	VF1	CT1-dike	Luttinen et al. 2015	52.8752	1.59132	14.8901	10.4758	0.174225	6.41188	10.0382	2.26897	1.05345	0.22082	1.32	94	113	31.0843	317		90	94	20	0.497102	9.0479	4.17805	157	25.9406	395.043	24.156	329	0.633803	0.527054	3.36108	6.55009	24.976	49.2671	5.84901	24.7035	6.00873	1.81851	5.6485	0.89412	5.24878	1.00138	2.56647	0.353406	2.05347	0.315934
AL/PD10-98	Vestfjella	VF1	CT1-dike	Luttinen et al. 2015	51.646	1.36752	13.3697	11.5715	0.171067	9.32724	9.94837	1.54775	0.845154	0.205688	3.23	755	258	32.8919	277		132	95	18	0.67493	12.087	3.7923	151	24.1962	296.509	10.3316	250	0.157874	0.396256	2.75525	6.12263	24.76	46.8677	5.35845	22.1063	5.35534	1.58715	5.12775	0.828646	4.85319	0.952261	2.40601	0.337971	2.02048	0.29229
112-KHG-91	Vestfjella	VF1	CT1-dike	Luttinen et al. 2015	48.654	1.603	15.966	11.916	0.142	8.563	9.672	2.673	0.575	0.236		91	104	27	332		99	89	23		8.8		160	25	361	8	382
115-KHG-91	Vestfjella	VF1	CT1-dike	Luttinen et al. 2015	54.87	1.66	14.78	11.17	0.17	4.64	7.98	2.58	1.88	0.26		12	60	25.5	310		66	104	21	0.64	11.37	5.21	212	28.36	747	31.5	383	0.41	0.92	5.07	9.45	33.96	65.99	8.34	33.19	7.06	2.07	6.56	1.02	5.86	1.13	2.88	0.4	2.4	0.36
116-KHG-91	Vestfjella	VF1	CT1-dike	Luttinen et al. 2015	50.962	2.078	14.884	13.254	0.197	5.281	9.32	2.383	1.313	0.328		66	112	26	362		166	108	27		10.1		189	30	497	18	357
121-KHG-91	Vestfjella	VF1	CT1-dike	Luttinen et al. 2015	50.245	1.336	13.924	11.927	0.186	8.977	10.405	2.182	0.633	0.185	2.3	497	227	36.2	315		141	87	23	0.3	4.89	2.65	106	22.32	301	10	305	0.26	0.17	0.91	2.51	12.44	25.37	3.27	14.74	4.09	1.44	4.36	0.72	4.41	0.83	2.18	0.29	1.73	0.27
218sk-92	Vestfjella	VF1	CT1-dike	Luttinen et al. 2015	54.93	1.6	15.73	11.03	0.16	4.7	6.41	2.74	2.45	0.25		35	54	24	279		57	86	24	0.71	12.57	4.87	188	29	1072	41	300		0.81	4.09	8	32.94	63.16	7.18	29.46	6.81	2.03	6.27	0.98	5.57	1.1	2.75	0.38	2.25	0.33
3a-MHR-94	Vestfjella	VF1	CT1-dike	Luttinen et al. 2015	53.8599	1.1412	14.7833	10.5254	0.164035	6.66204	8.7955	2.90835	0.996287	0.164035		61	152	29.1389	236		90	88	18	0.517446	9.28938	4.02289	152	24.9766	389.326	19.1058	326	0.321824	0.545407	3.3492	5.67488	24.1296	45.8475	5.29433	21.8648	5.34208	1.53541	5.20002	0.851754	4.92489	0.955203	2.51275	0.339065	2.02772	0.310391
29-SKV-00	Vestfjella	VF1	CT1-dike	Luttinen et al. 2015	51.97	1.022	14.93	11.25	0.169	7.74	9.18	2.66	0.94	0.126		72	218	26.1204	251		94	87	19	0.44509	7.61558	3.34463	125	20.3891	343.533	27.2768	332	0.867795	0.530302	2.94736	5.98839	20.3694	38.4436	4.38292	18.031	4.39596	1.39849	4.30751	0.682998	4.07076	0.791869	2.041	0.286056	1.69716	0.252587
31-SKV-00	Vestfjella	VF1	CT1-dike	Luttinen et al. 2015	53.9	0.99	15.45	9.14	0.16	6.15	10.38	2.78	0.9	0.15		182	89	25	254		100	73	19		7.8		113	22	359	20	347
26e-SKV-00	Vestfjella	VF1	CT1-dike	Luttinen et al. 2015	49.27	0.501	15.48	9.24	0.149	10.88	12.1	2.06	0.27	0.048		830	297	28	195		38	57	17	0.0969038	1.71173	0.946989	38	8.99913	121.863	4.23372	302	0.0719446	0.0797068	0.510212	1.58977	4.89708	9.85217	1.2443	5.72752	1.66091	0.770711	1.79873	0.305179	1.86631	0.358811	0.893836	0.12518	0.729783	0.106316
38-SKV-00	Vestfjella	VF1	CT1-dike	Luttinen et al. 2015	50.55	1.476	17.09	10.76	0.159	5.44	10.57	3.03	0.75	0.172		200	113	25	303		174	81	22		9.1		123	24	304	15	359
8-MHR-94	Vestfjella	VF1	CT1-dike	Luttinen et al. 2015	48.13	1.06	14.69	12.28	0.18	11.35	9.39	2.31	0.48	0.12		545	357	19	248		137	86	17	0.31	5.36	2.14	82	16.96	200	9.5	301	0.11	0.23	1.26	2.38	10.9	21.56	2.63	11.88	3.24	1.17	3.52	0.57	3.35	0.64	1.67	0.22	1.39	0.2
34-SKV-00	Vestfjella	VF1	CT1-dike	Luttinen et al. 2015	49.43	1.549	17.62	12.23	0.173	5.12	10.46	2.73	0.54	0.154		52	92	16	315		200	91	22		8		110	24	179	11	320
27-KHG-90	Vestfjella	VF3	CT3-dike	Luttinen et al. 2015	48.28	2.13	13.39	13.26	0.19	9.67	9.99	2.39	0.5	0.21		366	353	30	363		165	120	25		6.2		119	25	125	9	308				1.44	10.7		3.2	14.8	4.6	1.5	3.9	0.6	4	0.8	1.8		1.7
38-KHG-90	Vestfjella	VF3	CT3-dike	Luttinen et al. 1998	48.34	1.91	13.53	12.8	0.2	10.44	9.45	2.61	0.49	0.22		685	167	32	366		48	108	21	0.33	5.17	3.06	111	22	153	10	282	1.21	0.11	0.51	2.2	8.34	19.39	2.91	14.33	4.48	1.66	4.89	0.8	4.54	0.88	2.25	0.3	1.81	0.26
AL/P3b-98	Vestfjella	VF3	CT3-dike	Luttinen et al. 2015	50.1431	1.94018	13.1908	12.3077	0.173989	7.81938	11.724	1.99278	0.495665	0.212428	1.07	302	142	38.5152	357		173	94	20	0.491923	7.78814	3.48292	132	22.6918	170.325	4.69168	332	0.121173	0.217105	1.10116	3.02739	13.9362	30.0051	3.93082	18.5677	5.15293	1.80945	5.227	0.828449	4.78837	0.89782	2.25355	0.286846	1.7276	0.251315
AL/P4-98	Vestfjella	VF3	CT3-dike	Luttinen et al. 2015	46.5315	2.18735	14.7968	14.6641	0.201043	8.21262	9.83102	2.66383	0.643339	0.268393	0.97	108	180	33.1595	379		98	115	21	0.576105	9.28266	3.64243	135	24.6317	295.747	9.51675	500	1.16228	0.222263	0.86211	2.5342	15.0217	35.5547	4.82476	22.6952	6.07258	2.04892	5.89362	0.916211	5.27378	0.971335	2.44416	0.320708	1.92281	0.287776
362p	Vestfjella	VF3	CT3-dike	Luttinen et al. 2015	50.2	1.61	14.3	12.39	0.18	6.78	11.85	2.26	0.31	0.14		197	93	36	384		169	92	22		4.5		85	21	90	5	243
AL/PD3-98	Vestfjella	VF3	CT3-dike	Luttinen et al. 2015	50.976	1.8241	13.9502	11.8481	0.191374	7.23193	11.7544	1.84323	0.181302	0.199432		295	106	30	383		222	95	23		5.8		106	25	79	1	228
AL/KB1-98	Vestfjella	VF3	CT3-dike	Luttinen et al. 2015	47.6702	2.30803	14.3061	14.8239	0.257348	6.48436	11.1551	1.9757	0.800413	0.218847	2.1	134	94	37.12	377		271	104	22	0.684726	10.204	3.35914	124	27.0631	205.236	10.1628	285	0.188091	0.263264	1.24598	2.64533	11.5121	26.0312	3.54422	17.1324	5.23947	1.7972	5.65537	0.954812	5.63771	1.08199	2.72324	0.35401	2.08418	0.309457
AL/KB7-98	Vestfjella	VF3	CT3-dike	Luttinen et al. 2015	49.0381	1.57434	15.1644	11.3545	0.179779	7.7295	12.2189	2.16345	0.335182	0.241737	2.03	306	112	34.4307	317		121	87	23	0.203967	3.33373	3.01326	122	22.4999	158.565	3.3096	271	0.046338	0.0875839	0.304208	1.78137	6.60544	16.2059	2.40067	12.4991	3.90113	1.56404	4.50124	0.759114	4.5276	0.880916	2.25137	0.303025	1.73638	0.256773
AL/KB13-98	Vestfjella	VF3	CT3-dike	Luttinen et al. 2015	50.7808	1.86767	14.8765	12.7383	0.19153	5.43175	11.3094	2.32066	0.293882	0.189503	1.3	100	53	36.5683	373		167	99	20	0.254967	4.17657	3.0065	111	28	129.948	3.56059	289	0.0620307	0.119988	0.510609	1.82453	7.26173	17.8964	2.61855	13.474	4.45848	1.70119	5.20682	0.914215	5.51934	1.11372	2.84136	0.377845	2.22707	0.328473
AL/KB14-98	Vestfjella	VF3	CT3-dike	Luttinen et al. 2015	50.4947	1.74116	14.771	11.0479	0.163898	7.16295	12.2215	2.04367	0.131523	0.221566	1.99	386	104	36.1038	360		158	89	21	0.39847	7.11003	2.42828	90	22.4992	105.603	0.942287	320	0.148148	0.124155	0.540835	1.12003	9.37297	20.6889	2.84365	13.8779	4.19072	1.56084	4.60044	0.76725	4.57831	0.879073	2.24766	0.295942	1.76268	0.258383
AL/KB15-98	Vestfjella	VF3	CT3-dike	Luttinen et al. 2015	51.4604	1.88496	14.5486	13.2806	0.193847	5.6135	10.5102	2.18078	0.141347	0.18577		102	54	24	367		172	105	23		4.6		110	28	101	0	275
AL/KB16-98	Vestfjella	VF3	CT3-dike	Luttinen et al. 2015	50.8815	1.51992	13.7425	11.9122	0.185846	7.65483	11.6128	1.95891	0.371691	0.159727		225	120	35	324		109	85	21		5.5		100	23	123	5	238
AL/KB18-98	Vestfjella	VF3	CT3-dike	Luttinen et al. 2015	51.2379	1.28624	13.93	12.0485	0.17828	7.33265	11.0695	2.00439	0.765496	0.147056		196	68	33	314		124	85	21		4.5		73	22	300	16	236
AL/KB20-98	Vestfjella	VF3	CT3-dike	Luttinen et al. 2015	50.0145	1.68184	14.4244	11.9041	0.180305	7.34241	11.5295	2.39405	0.26044	0.268454		271	105	31.4	323		135	90	18	0.22	3.6	3.45	136	23.39	213	5.2	323	0.99	0.1	0.34	1.55	7.44	18.32	2.99	14.89	4.3	1.7	5.02	0.82	4.86	0.93	2.38	0.32	1.88	0.28
113-KHG-91	Vestfjella	VF3	CT3-dike	Luttinen et al. 2015	49.996	1.478	13.045	12.053	0.183	10.579	10.124	2.112	0.232	0.197	2.11	754	261	33.1	301		120	92	22	0.2	3.82	1.89	75	18.55	172	10	305	1.19	0.06	0.38	1.37	6.82	15.04	2.14	10.39	3.23	1.24	3.79	0.66	3.64	0.7	1.79	0.24	1.45	0.21
118-KHG-91	Vestfjella	VF3	CT3-dike	Luttinen et al. 2015	49.987	1.447	13.626	11.075	0.179	9.848	11.945	1.51	0.243	0.14		619	222	38	374		165	64	19		3.8		84	18	139	4	211
119-KHG-91	Vestfjella	VF3	CT3-dike	Luttinen et al. 2015	50.632	1.681	14.017	12.405	0.179	6.736	11.587	2.128	0.464	0.17		152	60	26	357		120	95	22		4.5		101	24	184	4	239
120-KHG-91	Vestfjella	VF3	CT3-dike	Luttinen et al. 2015	49.526	1.707	14.92	11.963	0.168	7.116	11.913	2.024	0.445	0.218		362	99	33	342		131	94	21		6.3		91	21	211	5	316
127-KHG-91	Vestfjella	VF3	CT3-dike	Luttinen et al. 2015	48.161	1.504	12.166	12.678	0.2	12.66	10.13	1.613	0.675	0.213	3	865	372	32	316		121	91	18	0.2	4.11	1.86	78	18.87	116	23	245	0.4	0.09	0.33	1.25	6.79	15.17	2.22	10.98	3.24	1.19	3.87	0.64	3.67	0.71	1.77	0.24	1.41	0.21
x4-KHG-91	Vestfjella	VF3	CT3-dike	Luttinen et al. 2015	46.861	1.389	9.205	12.679	0.19	16.506	10.539	2.01	0.44	0.186		1451	534	31	292		106	86	15		7.6		87	18	304	38	79
AL/UP11-98	Vestfjella	VF3	CT3-dike	Luttinen et al. 2015	49.9814	1.93064	13.934	12.6593	0.194171	6.85131	11.7408	2.19323	0.30182	0.213286	0.49	249	86	35.6454	396		84	106	23	0.258311	5.16642	2.88899	108	26.3049	130.648	3.497	277	0.0336548	0.133588	0.257109	1.76342	8.60846	19.7197	2.78249	14.2228	4.53558	1.69804	5.25025	0.880752	5.28577	1.03669	2.62235	0.349334	2.05563	0.297846
AVL/FR2d-03	Vestfjella	VF3	CT3-dike	Luttinen et al. 2015	51.586	1.69182	14.4688	11.2507	0.184843	6.83489	10.904	2.5049	0.343909	0.230215		387.8	113.4	31.8137	330.1		131.1	100	20.7	0.305054	4.83588	2.67555	95.7	25.7838	269.015	7.30392	324.5	0.827363	0.160143	0.564707	1.9458	8.85791	20.8908	2.97226	14.1257	4.00909	1.45901	4.82102	0.847783	5.12609	1.04092	2.67913	0.357464	2.20774	0.328679
AVL/FR2e-03	Vestfjella	VF3	CT3-dike	Luttinen et al. 2015	51.5125	1.73848	14.8038	11.3299	0.182914	6.28441	10.5436	2.66368	0.725596	0.215143		282.9	90.9	31.4326	338.6		149.2	91.1	21.1	0.281904	4.56494	2.63604	91.6	25.992	322.057	16.0509	361.1	0.345641	0.147251	0.520781	1.64915	8.28224	19.7822	2.85411	13.5379	3.96354	1.45676	4.75408	0.849971	5.13598	1.03471	2.66142	0.377078	2.11727	0.325409
AVL/FR2f-03	Vestfjella	VF3	CT3-dike	Luttinen et al. 2015	51.5419	1.7707	14.7522	11.447	0.179224	5.96884	11.0296	2.44478	0.618228	0.247541		267	86.1	30.1	320.6		138.5	99.3	21.7		4.9		105.4	27	307	12	300
AVL/FR2h-03	Vestfjella	VF3	CT3-dike	Luttinen et al. 2015	51.5675	1.75495	14.5647	11.4122	0.191535	6.29924	10.9787	2.41209	0.607372	0.211792		225.2	82.6	30.7	347.5		135.7	99.9	21.9		4.2		91.3	23	299	13	324
11-KHG-90	Vestfjella	VF3	CT3-dike	Luttinen et al. 2015	49.2	2.36	13.99	12.99	0.18	7.17	10.59	2.69	0.56	0.25	1.04	327	183	32	390		163	119	25	0.37	6.67	3.58	134	28	187	11	338	1.94	0.29	1.14	2.47	11.71	26.34	3.71	17.79	5.64	2	5.99	1.03	5.79	1.13	2.76	0.36	2.01	0.3
AL/B21a-98	Vestfjella	VF3	CT3-dike	Luttinen et al. 2015	46.6	2.34414	14.4589	14.3922	0.183894	7.88118	11.3469	2.06123	0.4951	0.236435		390	258	33.9034	396		184	120	28	0.403778	6.59968	3.6191	132	28.5035	107.424	7.52058	291	0.942546	0.291758	1.46214	2.33171	11.8093	26.7499	3.69931	18.3042	5.71793	2.1209	6.2821	1.04652	6.04944	1.1604	2.81543	0.357849	2.04218	0.290831
AL/UP2-98	Vestfjella	VF3	CT3-dike	Luttinen et al. 2015	50.6095	1.84363	14.1787	12.1674	0.177736	6.96885	11.6984	2.05852	0.0903741	0.206856	0.69	276	110	35.5625	377		163	99	20	0.281763	4.66471	3.00923	116	26.1183	75.0877	0.585787	256	0.0246333	0.151701	1.71555	1.56339	7.90133	18.8873	2.75206	14.1156	4.51937	1.68941	5.30699	0.897368	5.44362	1.04208	2.63766	0.353906	2.06924	0.307804
25-KHG-90	Vestfjella	VFD	CT3E-dike	Luttinen et al. 1998	47.32	3.69	12.72	16.72	0.25	5.7	9.73	2.73	0.72	0.42		120	62	28	425		403	159	29	0.99	16.49	6.02	212	42	241	17	277	0.76	0.3	1.24	2.94	18.68	42.93	5.9	28.59	8.78	2.81	9.5	1.58	9.01	1.77	4.46	0.59	3.44	0.48
33-KHG-90	Vestfjella	VFD	CT3E-dike	Luttinen et al. 1998	51.98	3.15	13.01	13.26	0.17	5.56	9.67	2.4	0.51	0.3		143	115	29	392		203	129	29	0.53	8.76	5.17	177	43	180	5	286	0.25	0.33	1.4	2.95	17.79	39.86	5.39	25.51	7.7	2.62	8.75	1.48	8.98	1.75	4.4	0.58	3.28	0.47
P9-KHG-90	Vestfjella	VFD	CT3E-dike	Luttinen et al. 2015	50.97	2.84	12.67	14.55	0.23	5.33	10.44	2.18	0.52	0.29		109	42	45.8	445		334	115	24	0.65	9.32	4.96	173	45.09	111	11	215		0.33	1.29	2.37	13.8	31.64	4.46	21.37	7.2	2.46	8.41	1.45	8.75	1.75	4.48	0.63	3.66	0.55
AVL/P1-03	Vestfjella	VFD	CT3E-dike	Luttinen et al. 2015	50.764	2.80522	12.9426	14.3035	0.240769	5.48629	10.4653	2.24268	0.466033	0.283718		106	575	40.4	443		341	119	23	0.59	9.06	5	173	43.43	135	11.2	192	0.34	0.35	1.48	2.32	13.6116	33.3231	4.88663	23.0808	7.11165	2.34232	8.15708	1.43832	8.85329	1.74995	4.53238	0.627848	3.69161	0.55599
359f-AVL	Vestfjella	VFD	CT3E-dike	Luttinen et al. 2015	50.3	4.26	13.39	18.37	0.31	3.97	5.86	2.53	0.45	0.57	2.61	57	64	25	337		577	185	32	1.23	20.59	8.18	291	62	227	9	225	0.5	0.59	2.3	4.89	26.08	60.22	8.22	40.41	12.23	4.27	13.46	2.22	12.93	2.48	6.27	0.85	4.97	0.71
AL/PD8-98	Vestfjella	VFD	CT3E-dike	Luttinen et al. 2015	49.1248	3.97855	12.0712	16.3331	0.245877	4.6241	9.75412	2.34747	1.02196	0.498836	0.8	78	52	34.8466	377		425	155	27	1.50269	23.0342	7.6597	270	55.9928	226.095	23.5856	295	0.882919	0.624765	2.75829	3.26637	26.3951	59.1625	7.88525	37.9153	11.3548	3.37015	12.1735	1.99017	11.5676	2.2105	5.45305	0.727039	4.18231	0.606502
AL/PD9-98	Vestfjella	VFD	CT3E-dike	Luttinen et al. 2015	50.0425	2.87979	13.7114	14.0643	0.216389	4.75247	10.2026	2.16389	1.48641	0.480303	1.55	95	52	29.5391	420		97	142	26	1.22488	18.8261	5.66888	210	39.7101	400.037	23.7294	355	0.549683	0.934208	3.12089	2.83678	26.774	56.5797	7.23484	33.0311	8.83521	2.65038	8.85428	1.43106	8.35118	1.56913	3.80302	0.49949	2.8941	0.420398
AL/PD11-98	Vestfjella	VFD	CT3E-dike	Luttinen et al. 2015	48.2788	3.27935	13.3686	15.5116	0.23395	5.155	10.3809	2.24835	1.14443	0.399032	1.71	84	62	34.2077	415		335	136	25	1.2416	17.6773	5.54609	205	41.26	273.747	28.0409	330	0.665138	0.488638	3.66705	1.86571	21.5865	47.0675	6.28647	29.8722	8.49829	2.88244	9.07928	1.48308	8.60006	1.62422	4.11657	0.543175	3.12822	0.457834
AL/KB19-98	Vestfjella	VFD	CT3E-dike	Luttinen et al. 2015	49.354	3.53297	12.9596	14.211	0.215994	5.41505	10.3738	2.47429	1.05462	0.408664	0.88	133	82	32.1748	538		323	115	25	0.953098	14.8925	6.68517	252	37.0005	271.192	21.0089	351	0.393172	0.5362	1.94654	4.68176	22.2571	51.991	7.16237	34.3952	9.42585	3.09278	9.24662	1.43095	7.98366	1.46819	3.60621	0.47055	2.70993	0.396768
x3-KHG-91	Vestfjella	VFD	CT3E-dike	Luttinen et al. 2015	47.683	4.119	12.633	16.612	0.24	4.835	10.231	2.25	0.926	0.471		56	44	26	602		406	136	30		17		253	38	409	15	341
AL/UP1-98	Vestfjella	VFD	CT3E-dike	Luttinen et al. 2015	47.7958	2.92175	13.5721	15.163	0.218449	5.69383	10.9932	2.82163	0.536009	0.284186		77	74	24	498		199	117	26		13.5		181	28	201	4	444
AL/UP5b-98	Vestfjella	VFD	CT3E-dike	Luttinen et al. 2015	46.0129	4.13964	13.2497	15.9891	0.213541	5.28767	11.4905	2.60316	0.325395	0.688414	1.02	67	57	30.2994	523		272	138	27	1.0249	15.2787	7.20682	275	42.3624	347.706	4.32487	368	0.0380636	0.36995	1.48405	2.62309	25.6314	60.1205	8.23012	39.8057	10.7635	3.65257	10.487	1.59681	9.03128	1.68447	4.11764	0.538925	3.1564	0.463105
AL/UP7b-98	Vestfjella	VFD	CT3E-dike	Luttinen et al. 2015	48.2634	3.23676	12.8541	16.5082	0.254656	5.40639	10.2065	2.23329	0.707378	0.329436	0.27	119	70	34.2928	434		346	149	26	0.819272	11.8191	5.19905	192	41.9552	252.27	14.5185	246	0.180485	0.374643	1.41694	1.6893	16.5129	37.5069	5.17291	25.2822	7.91506	2.51566	8.72957	1.47227	8.69618	1.66952	4.21836	0.552989	3.1315	0.473704
AL/BR1-98	Mannefallknausane	VFD	CT3E-dike	Luttinen et al. 2015	47.6205	3.14099	13.2476	16.2814	0.24776	5.92602	10.0823	2.53828	0.566309	0.348887	0.15	148	95	35.7487	392		373	143	28	0.734849	11.2385	5.16076	190	41.1586	145.65	17.2328	243	0.479426	0.364588	1.58635	2.98649	15.3597	35.4623	4.93549	24.4848	7.59119	2.40805	8.47002	1.40994	8.33912	1.6377	4.05247	0.545711	3.24305	0.47269
21-mk-91	Mannefallknausane	VFD	CT3E-dike	Luttinen et al. 2015	48.477	4.435	11.928	16.761	0.248	4.477	9.155	2.964	0.998	0.558	0	67	32	32.8	448		447	164	30	1.4	23.72	8.45	289	59.02	312	26	296	1.55	0.64	2.45	3.9	27.63	62.19	8.54	41.62	11.84	3.51	13.53	2.14	12.67	2.37	5.75	0.78	4.54	0.64
24-mk-91	Mannefallknausane	VFD	CT3E-dike	Luttinen et al. 2015	47.054	4.77	11.844	16.634	0.242	5.554	9.875	2.686	0.909	0.432		97	54	31	553		404	140	27		21.6		242	47	304	29	263
P1-KHG-90	Vestfjella	VFD	Low-Nb	Luttinen et al. 2015	50.02	1.59	14.14	12.26	0.17	7.08	12.23	2.13	0.24	0.14		248	85	35.8	362		150	96	23	0.2	3.11	2.26	84	21.88	88	4	246	0.57	0.09	0.31	1.01	5.19	12.66	1.93	10.01	3.59	1.47	4.39	0.73	4.39	0.86	2.12	0.28	1.64	0.24
P2-KHG-90	Vestfjella	VFD	Low-Nb	Luttinen et al. 2015	51	1.5	14.03	11.27	0.18	7.1	12.42	2.05	0.32	0.13		258	84	35.7	350		140	75	20	0.17	2.63	1.94	77	18.89	98	5	238	0.4	0.07	0.25	1.57	4.34	10.63	1.63	8.7	3.15	1.23	3.78	0.64	3.84	0.77	1.88	0.25	1.41	0.21
P4-KHG-90	Vestfjella	VFD	Low-Nb	Heinonen et al. 2010	49.73	1.43	13.95	10.52	0.16	9.09	12.6	2.23	0.16	0.13		640	226	34.4	334		146	73	20	0.14	2.28	1.95	73	19.04	50	3.8	227	1.32	0.05	0.18	0.65	3.63	9.76	1.56	8.53	3.08	1.18	3.87	0.64	3.88	0.73	1.84	0.24	1.4	0.21
P5-KHG-90	Vestfjella	VFD	Low-Nb	Luttinen et al. 2015	48.68	1.49	11.88	12.32	0.18	12.29	10.84	2.01	0.17	0.13		626	395	33.1	358		148	87	20	0.14	2.32	1.89	72	18.55	52	4	200	1.27	0.05	0.18	0.64	3.63	9.58	1.55	8.39	3.08	1.17	3.8	0.63	3.79	0.73	1.8	0.24	1.36	0.2
P6-KHG-90	Vestfjella	VFD	Low-Nb	Luttinen et al. 2015	50.2	1.69	13.87	11.65	0.18	7.73	12.07	2.22	0.23	0.15		402	160	37.2	386		168	78	20	0.17	2.84	2.31	84	23.12	64	6	244	0.77	0.06	0.22	0.82	4.29	11.78	1.87	10.21	3.69	1.36	4.55	0.78	4.58	0.89	2.18	0.29	1.72	0.26
P8-KHG-90	Vestfjella	VFD	Low-Nb	Luttinen et al. 2015	50.55	1.66	13.8	11.27	0.18	7.96	11.47	2.59	0.39	0.15		394	170	35.4	358		164	81	21	0.19	2.95	2.26	84	21.53	105	8	277	1.73	0.08	0.3	1.18	4.81	12.29	1.9	10.03	3.59	1.4	4.43	0.74	4.48	0.84	2.14	0.28	1.65	0.24
P11-KHG-90	Vestfjella	VFD	Low-Nb	Luttinen et al. 2015	50.27	1.58	14.04	12.23	0.19	6.84	11.98	2.42	0.3	0.14		242	85	35.2	376		146	91	23	0.19	3.08	2.2	82	21.7	98	7	263	1.83	0.09		1.02	5.11	12.75	1.96	10.27	3.54	1.38	4.34	0.73	4.39	0.87	2.13	0.28	1.62	0.23
AVL/P3-03	Vestfjella	VFD	Low-Nb	Luttinen et al. 2015	48.6211	1.72455	13.4902	12.1104	0.16823	10.1568	11.6766	1.77721	0.133248	0.141645		569	307.2	31.5	385.3		182.1	88	20	0.156856	2.63015	2.31067	75.6148	20.9713	41.5376	2.61769	196.5	0.433198	0.0688533	0.267833	0.65063	4.42658	12.035	2.03627	10.652	3.49315	1.49334	4.19282	0.726266	4.4287	0.842079	2.12295	0.289005	1.64679	0.239226
P27-AVL	Vestfjella	VFD	Low-Nb	Luttinen et al. 2015	50.42	1.77	14.08	10.6	0.18	7.98	12.34	2.16	0.23	0.15		414	154	33	415		185	80	25	0.17	3.13	2.46	86	22	70	1	220		0.06	0.23	0.98	4.97	12.22	1.95	10.53	3.85	1.43	4.34	0.79	4.73	0.92	2.42	0.31	1.73	0.26
5-mk-91	Mannefallknausane	VFD	Low-Nb	Heinonen et al. 2010	45.55	1.31	9.09	13.66	0.19	19.83	8.59	1.53	0.14	0.11		1175	943	28	290		134	91	18	0.2	2.75	1.86	66	16.52	30	7	156	2.66	0.09	0.32	1.07	4.03	10.11	1.6	8.33	2.78	1.04	3.37	0.59	3.44	0.66	1.63	0.21	1.18	0.17
AL/B1a-03	Vestfjella	VFD	D-FP	Heinonen et al. 2008	52.6977	2.36517	11.9056	15.3193	0.221488	10.0073	5.76673	1.3394	0.195837	0.181458	7.38	964.6	432.9	33.1	395.5		174.5	100.7	18	0.52986	7.06929	2.91091	104	19.133	82.8136	4.90608	335.395	2.1575	0.176887	0.605555	1.54961	9.78412	26.0863	3.86421	17.9381	4.67119	1.21821	4.77483	0.756086	4.4072	0.816447	1.94288	0.25874	1.48187	0.21591
AL/B1b-03	Vestfjella	VFD	D-FP	Heinonen et al. 2008, 2010	46.5681	1.61334	8.31176	13.1404	0.195371	19.2113	9.08734	1.41124	0.338124	0.122935	1.55	1210.5	848	25.8213	306		126.9	93.1	14.9	0.386788	5.21858	2.09987	77	14.0484	105.754	9.19343	250.582	1.64885	0.130545	0.433011	0.840532	7.06379	18.74	2.79148	12.9084	3.42235	1.18502	3.53794	0.547222	3.22511	0.600602	1.46121	0.195586	1.07556	0.156472
AL/B3-03	Vestfjella	VFD	D-FP	Heinonen et al. 2008	48.2808	2.62096	10.6577	13.016	0.191044	12.9816	9.95612	1.81501	0.258864	0.22189	2.68	988.1	633.7	27.8318	448.3		248.8	97	21.1	0.490781	6.67964	3.5772	132	21.1687	48.9219	5.26714	282.018	1.12711	0.186182	0.600298	2.27097	10.1767	28.2231	4.37505	20.8947	5.50988	1.89036	5.69644	0.882635	4.92574	0.891454	2.13944	0.280117	1.54868	0.221829
AL/B5-03	Vestfjella	VFD	D-FP	Heinonen et al. 2008	45.4603	1.59145	7.08916	13.2112	0.197339	23.8128	7.1341	1.11453	0.255763	0.133406	1.78	1275.2	1193	22.1472	280.2		127.2	91	15.4	0.396815	5.20477	2.20475	81	13.5713	66.4524	7.25978	225.471	4.18102	0.143155	0.458081	0.844247	7.11134	19.0402	2.82984	13.0591	3.42513	1.19375	3.4681	0.545692	3.14212	0.576648	1.42124	0.18222	1.00765	0.147406
AL/B7-03	Vestfjella	VFD	D-FP	Heinonen et al. 2008, 2010	47.0534	1.69842	8.58707	12.8734	0.197957	18.5747	9.24189	1.41456	0.225722	0.132886	1.23	1132.4	807.3	28.1761	320.9		139.1	95.1	14.9	0.409808	5.54812	2.19099	80	15.0987	55.7823	6.67371	242.198	3.33535	0.144313	0.450644	1.1253	7.52612	20.0475	2.97493	13.8291	3.64173	1.27578	3.72851	0.589504	3.40752	0.62923	1.56129	0.203143	1.14723	0.163162
AL/B8a-03	Vestfjella	VFD	D-FP	Heinonen et al. 2008	44.9989	1.57438	6.83697	13.2039	0.195219	24.1472	7.37776	1.30893	0.228054	0.128669	0.68	1400.1	1256.4	24.5124	283.3		123.7	92.1	13.3	0.405996	5.54316	2.12591	80	13.285	55.5972	4.88134	222.306	0.862058	0.161409	0.480202	1.19468	7.83722	20.7539	3.01701	13.5669	3.44439	1.18227	3.45863	0.533855	3.03236	0.545604	1.32801	0.17617	0.978693	0.144083
AL/B8b-03	Vestfjella	VFD	D-FP	Heinonen et al. 2008	44.0733	1.31302	5.7713	13.4539	0.19642	27.5166	6.28227	1.05642	0.227167	0.109529	1.07	1512.3	1480.9	21.2199	236.9		103.9	91.3	12.3	0.336197	4.54927	1.72887	66	10.6846	37.4054	5.68504	180.225	0.721887	0.122159	0.382602	0.98091	6.28147	16.6332	2.42977	11.0697	2.76184	0.948857	2.71905	0.43559	2.48773	0.449437	1.11582	0.142473	0.815753	0.119394
AL/B9-03	Vestfjella	VFD	D-FP	Heinonen et al. 2008, 2010	45.527	1.43565	7.00584	12.7386	0.188224	24.3895	7.14258	1.30906	0.148028	0.115401	1.04	1252.2	1270.2	23.0204	265.3		116	89.2	13.4	0.255226	3.45866	1.84993	69	12.8057	25.3271	3.57216	187.622	0.886809	0.098354	0.321088	0.809724	5.48351	15.0871	2.32021	11.147	3.04826	1.10548	3.16681	0.507106	2.93234	0.545871	1.3023	0.16808	0.945621	0.136553
AL/B13a-98	Vestfjella	VFD	D-FP	Heinonen et al. 2008	46.1432	2.88857	10.5318	12.882	0.174518	14.8146	10.8803	1.19137	0.247695	0.246038	4.86	726.6	568.5	29.4598	427.9		205.3	96.8	20.6	0.661785	8.973	4.02224	150	22.6602	41.8187	4.46529	236.637	1.50911	0.262266	0.897454	1.98256	12.6221	34.3047	5.15016	24.0797	6.11329	2.31591	6.13203	0.943241	5.29986	0.948943	2.22827	0.291302	1.55917	0.221914
AL/B13b-98	Vestfjella	VFD	D-FP	Heinonen et al. 2008	45.6598	2.57745	8.85906	13.9909	0.195642	18.0893	9.38077	0.852797	0.170559	0.223734	6.45	929	974	27.8375	397		186	106	22	0.593409	8.24622	3.52934	138	20.6241	26.0778	4.32568	179.703	2.93643	0.224265	0.737415	2.25973	10.9566	28.6806	4.1097	19.7101	5.42963	1.97594	5.36452	0.840787	4.65631	0.827216	1.98363	0.248104	1.34598	0.195064
AL/B14e-98	Vestfjella	VFD	D-FP	Heinonen et al. 2008	46.7532	2.49305	8.5828	15.0334	0.240201	15.7508	9.41914	1.31336	0.210094	0.203959	3.76	1184.1	938.2	28.839	386.7		179.7	107.9	17.1	0.559117	7.53833	3.39189	124	18.3506	37.7716	6.83671	272.514	4.17156	0.191727	0.66125	1.33703	10.3903	28.4626	4.33741	20.1837	5.13702	1.7087	5.18733	0.782548	4.34525	0.766369	1.81107	0.232037	1.2452	0.175121
AL/B16-98	Vestfjella	VFD	D-FP	Heinonen et al. 2008, 2010	45.3755	2.46858	8.76141	14.6187	0.200803	16.7136	9.74045	1.6284	0.279726	0.212791	1.07	931	732	29.759	401		184	98	22	0.622262	9.10497	3.53389	131	20.0484	50.9142	6.83892	321.181	2.00347	0.211482	0.859197	1.57736	11.3758	29.1238	4.15428	19.9147	5.43376	1.89369	5.42329	0.817856	4.52555	0.815019	1.90425	0.238986	1.29909	0.183931
AL/KB5-98	Vestfjella	VFD	D-FP	Heinonen et al. 2008, 2010	46.5336	3.00658	13.811	15.5926	0.18658	6.19569	11.7018	2.3424	0.385329	0.24438	1.79	85	97	29.9213	557		264	117	23	0.525418	7.583	3.4449	131	22.4105	128.194	4.62736	394.791	0.139525	0.207608	0.796054	2.08723	12.1254	29.5419	4.20166	20.9054	5.88491	2.17154	5.85106	0.91088	5.05073	0.912426	2.08538	0.27597	1.56305	0.222033
AL/KB17-98	Vestfjella	VFD	D-FP	Heinonen et al. 2008	46.505	3.01835	13.8321	15.9234	0.227516	6.16364	10.7848	2.80975	0.491516	0.243877	1.34	54.5	95.4	29.2	527.7		237.2	121.4	25	0.55	7.76	3.53	124	20.67	160	6.3	437	0.18	0.2	0.77	1.64	11.6698	29.8651	4.475	21.3962	5.59991	2.03182	5.69509	0.856166	4.79799	0.845842	2.07514	0.268048	1.4913	0.219244
117-KHG-91	Vestfjella	VFD	D-FP	Heinonen et al. 2008, 2010	43.742	3.313	11.626	16.591	0.207	11.311	10.204	1.604	0.995	0.406	1.67	410	375	35.6	487		173	130	26	1	17.22	5.18	202	27.85	326	22.4	768		0.48	1.83	2.91	23.27	52.28	7	32.61	8.26	2.77	7.95	1.17	6.29	1.06	2.44	0.31	1.81	0.25
MHR-1	Vestfjella	VFD	D-FP	Heinonen et al. 2008	47.96	1.53	11.01	10.79	0.19	16.52	9.4	1.24	1.21	0.17		980	684	29	300		154	91	16	0.41	6.4	2.62	102	17.78	313	26	284		0.14	0.42	1.42	7.53	16.69	2.4	12.15	3.67	1.33	3.91	0.63	3.69	0.69	1.58	0.22	1.26	0.19
128-KHG-91	Vestfjella	VFD	D-FP	Heinonen et al. 2008	46.875	2.655	13.851	15.988	0.219	6.164	11.363	2.386	0.274	0.223	0.87	68	78	31.3	516		197	115	25	0.4	7.35	3.36	123	21.53	110	2.7	422	0.06	0.2	0.63	1.97	10.78	26.7	3.91	19.01	5.29	1.88	5.42	0.84	4.7	0.86	2.05	0.28	1.49	0.22
AL/WM1b-98	Vestfjella	VFD	D-FP	Heinonen et al. 2008	44.5954	2.42757	10.5395	14.3786	0.198801	14.5155	10.5894	1.67832	0.849151	0.227772	1.93	1052	587	29.4503	421		200	98	25	0.491377	6.84417	3.10129	121	19.0006	93.2166	13.0901	291.897	0.209662	0.17687	0.565344	1.65568	9.08495	23.0715	3.32161	16.6669	4.91365	1.71946	5.04628	0.784774	4.39139	0.769207	1.74486	0.22574	1.19474	0.169999
AL/WM1c-98	Vestfjella	VFD	D-FP	Heinonen et al. 2008	44.0651	2.13908	9.13117	14.3703	0.204184	18.6484	9.24272	1.49706	0.510814	0.19115	1.25	1100.7	856	23.0056	374.9		176.5	100.4	17.5	0.453655	6.07815	2.89563	104	16.2509	80.9173	8.71409	281.209	0.136329	0.153741	0.518392	1.21892	8.32481	22.5742	3.4954	16.7109	4.63516	1.63293	4.64306	0.712694	3.98687	0.700085	1.62672	0.204055	1.12597	0.158751
AL/WM1e-98	Vestfjella	VFD	D-FP	Heinonen et al. 2008, 2010	43.6467	2.07292	8.85382	15.0997	0.201771	18.8821	9.02447	1.52583	0.501917	0.190729	1.58	1022	880	27.7388	364		171	100	17	0.43081	6.04861	2.74101	104	16.6461	90.5106	8.38537	302.756	0.125374	0.147811	0.489664	1.27511	7.75451	19.7799	2.88013	14.5108	4.32284	1.52005	4.46018	0.684459	3.79307	0.675414	1.54077	0.198561	1.06108	0.150209
AL/WM3a-03	Vestfjella	VFD	D-FP	Heinonen et al. 2008	43.8399	2.0772	8.87681	14.4377	0.204846	19.4682	8.99316	1.43146	0.484065	0.186699	1.3	1098.9	897.2	22.1941	361.1		169.6	99.3	20.7	0.431421	5.94815	2.80908	102	15.5507	76.4281	8.36695	270.248	0.129638	0.141612	0.486866	1.11452	7.91039	21.4824	3.33162	16.0085	4.30234	1.54661	4.58824	0.692278	3.81386	0.665916	1.55996	0.199174	1.06396	0.14431
AL/WM3b-03	Vestfjella	VFD	D-FP	Heinonen et al. 2008	44.1771	2.14496	9.17515	14.5067	0.203318	18.4566	9.02498	1.40081	0.720564	0.189848	2.24	1086.8	841.7	23.78	372.5		176.1	98.2	18.2	0.44701	5.98254	2.79388	103	15.9158	114.526	11.2317	312.824	0.273916	0.145924	0.489025	1.11389	8.01991	21.7462	3.39741	16.365	4.43776	1.54819	4.62142	0.697823	3.87892	0.686843	1.59954	0.199855	1.08475	0.15319
x2-KHG-91	Vestfjella	VFD	D-FP	Heinonen et al. 2008	47.56	4.016	12.67	16.05	0.233	5.115	10.168	3.028	0.699	0.462	0.28	89	50	30.4	585		225	132	29	1	16.49	6.76	246	40.2	268	14.2	441	0.23	0.43	1.28	3.41	21.45	53.02	7.59	37.16	10.25	3.34	10.21	1.58	8.78	1.59	3.73	0.48	2.79	0.39
x6-KHG-91	Vestfjella	VFD	D-FP	Heinonen et al. 2008	45.307	2.61	14.357	15.692	0.19	6.796	12.092	2.51	0.204	0.241	0.7	123	117	29.7	494		257	114	28	0.5	8.76	3.45	125	22.1	116	3.2	479	0.01	0.17	0.56	1.62	11.53	28.04	4.08	19.58	5.42	1.95	5.62	0.89	4.81	0.87	2.09	0.28	1.52	0.21
AL/B4-98	Vestfjella	VFE	E-FP	Heinonen et al. 2008	48.31	3.16804	11.4729	14.3121	0.175891	10.5435	8.56469	1.95879	1.06934	0.424737	4.46	361	350	21.4938	263		79	136	21	1.27626	18.0494	4.4496	170	30.0556	714.8	18.0617	246.117	0.300347	0.498723	2.01082	2.00232	18.1457	40.3445	5.31045	25.2016	7.58034	2.74879	8.24768	1.25299	6.97748	1.1841	2.68607	0.325633	1.69603	0.233102
AL/B7-98	Vestfjella	VFE	E-FP	Heinonen et al. 2008, 2010	49.073	3.15908	11.2889	13.6917	0.18026	10.4933	9.36546	1.76232	0.594153	0.391738	3.86	357	370	21.1262	258		80	132	25	1.23069	17.0564	4.09813	160	28.2169	164.754	7.85223	415	0.666296	0.460125	1.8629	2.18437	17.8777	38.1952	4.99474	23.4945	7.0987	2.60809	7.54889	1.18466	6.50828	1.10927	2.51704	0.30155	1.58902	0.219214
AL/B17-98	Vestfjella	VFE	E-FP	Heinonen et al. 2008	49.9514	3.04157	10.9901	13.1561	0.146268	10.1586	9.84802	1.94356	0.370678	0.393721	3.68	352	338	21.2836	263		76	131	26	1.25237	17.5461	4.16428	156	28.2677	139.847	6.91831	454.843	0.918558	0.465121	1.86162	3.20932	18.0568	38.8428	5.08489	23.8367	7.12352	2.61736	7.66519	1.1907	6.45981	1.12983	2.49803	0.308735	1.5881	0.216294
22-KHG-90	Vestfjella	VFE	E-FP	Luttinen et al. 1998; Heinonen et al. 2008	49.53	3.14	11.06	12.97	0.17	11.08	9.51	1.62	0.54	0.37	4.56	370	367	26	284		67	134	25	1.24	19.7	4.37	153	27	186	8.5	392		0.52	1.7	2.69	18.35	38.99	5.16	24.34	7.27	2.64	7.63	1.22	6.46	1.14	2.59	0.3	1.59	0.22
AL/B20a-98	Vestfjella	VFE	E-FP	Heinonen et al. 2008	44.9411	3.40683	9.27212	15.5029	0.179201	12.836	11.3662	1.47992	0.59398	0.421826	4.4	529	526	25.9269	311		127	143	25	1.43852	21.2915	4.44051	171	28.373	153.956	11.6126	354.626	1.25436	0.483571	1.90046	2.32792	21.1682	46.0696	6.00964	28.2706	7.90406	2.91486	8.05364	1.22596	6.59325	1.14663	2.53372	0.308031	1.58467	0.221478
14-KHG-90	Vestfjella	VFE	E-FP	Luttinen et al. 1998; Heinonen et al. 2008	44.87	3.21	8.59	17.03	0.31	14.27	9.53	1.26	0.53	0.39	5.45	549	696	26	319		110	156	25	1.38	20.4	4.33	159	28	176	14.2	391		0.52	1.33	3.01	21.1	44.6	5.9	27.09	7.62	2.51	7.4	1.17	6.35	1.09	2.49	0.31	1.63	0.23
JSH/B006	Vestfjella	VFE	E-FP	Heinonen et al. 2010	44.8626	3.0143	8.18743	16.1863	0.205861	15.542	9.02213	1.75243	0.867475	0.359429	2.42	579	660	18.6	285		116	152	20	1.24	18.54	4.04	151	23.74	225	20.8	520	4.03	0.45	1.69	2.24	18.94	43.71	6.1	27.39	7.12	2.47	7.21	1.1	5.93	1.02	2.29	0.28	1.42	0.2
CT1/307-AVL	Vestfjella	VF1	CT1-HTh	Heinonen et al. 2010	47.4996	0.49557	7.70887	12.4193	0.180207	26.2151	4.64034	0.655754	0.125144	0.0600691		1195	1321	17.2	144					0.11	1.5	0.92	41	9.54	60	10.5	76		0.11	0.51		3.82	8.53		5.08	1.48	0.55	1.76		1.93	0.39			0.83	0.13
CT1/B239-AVL	Vestfjella	VF1	CT1-HTh	Luttinen et al. 1998	53.21	0.94	12.55	10.23	0.17	10.44	7.62	1.86	2.74	0.14	2.88	560	215	23	233		64	78		0.24	4.61	2.02	89	18	829	62	464		0.2	1.27	2.39	12.15	23.55		12.34	3.4	1.2	3.44	0.59					1.44	0.22
CT1/B405-AVL	Vestfjella	VF1	CT1-HTh	Luttinen et al. 1998	54.3	1.38	14.63	10.19	0.17	5.76	8.83	3.17	1.17	0.28	2.8	124	42	33	295		69	96		0.54	6.27	4.13	169	31	690	28	630		0.46	2.2	6	28.08	54.48		26.38	6.3	1.94	5.98	1.01					2.55	0.38
CT1/B406-AVL	Vestfjella	VF1	CT1-HTh	Luttinen & Furnes 2000	54.14	1.37	14.58	10.51	0.16	5.84	8.36	3.49	1.16	0.28	2.55	126	44	33	279		72	102	22		10.5		163	29	806	24	415
CT1/B407-AVL	Vestfjella	VF1	CT1-HTh	Luttinen & Furnes 2000	54.25	1.46	14.28	10.59	0.17	5.58	8.98	3.21	1.09	0.29	2.4	123	36	40	283		91	111	22	0.58	11	4.37	178	32	589	27	660	0.29	0.48	2.35	6	29.27	56.94	6.64	27.75	6.53	1.97	6.01	1.03	6.2	1.22	3.28	0.43	2.6	0.38
CT1/B50B-AVL	Vestfjella	VF1	CT1-HTh	Luttinen et al. 1998	53.07	1.34	15.06	9.81	0.17	6.18	10.11	2.77	1.12	0.26	1.09	238	62	33	275		90	89		0.44	7.86	3.45	133	26	583	20	397		0.4	1.39	4.88	19.58	39.11		21.01	5.36	1.76	5.14	0.87					2.19	0.33
CT1/B70-AVL	Vestfjella	VF1	CT1-HTh	Luttinen & Furnes 2000	52.37	0.95	12.57	10.4	0.18	10.88	9.42	1.78	1.2	0.15		627	257	31	221		62	87	15	0.26	4.9	2.09	86	19	250	20	319	0.18	0.2	1.37	3	12.56	24.62	2.98	12.93	3.48	1.23	3.55	0.63	3.75	0.72	1.95	0.25	1.54	0.23
CT1/P10-AVL	Vestfjella	VF1	CT1-HTh	Luttinen et al. 1998	55.01	1.23	14.34	10.04	0.15	5.49	9.32	2.37	1.78	0.15	1.09	91	37	28	282		105	87		0.36	6.27	3.88	139	28	395	52	260		0.47	1.86	5.91	14.97	30.92		17.25	4.91	1.47	5.2	0.95					2.39	0.37
CT1/P11-AVL	Vestfjella	VF1	CT1-HTh	Luttinen & Furnes 2000	53.81	1.13	14.92	10	0.16	7.3	7.18	3.02	2.23	0.15	2.66	320	96	27	246		77	86	22	0.35	5.93	2.75	109	24	780	65	298		0.41	1.72	2.65	13.94	27.72	3.32	14.49	4.11	1.28	4.34	0.78	4.79	0.94	2.51	0.33	1.98	0.31
CT1/P1-AVL	Vestfjella	VF1	CT1-HTh	Luttinen & Furnes 2000	52.51	0.88	11.93	9.81	0.17	13.34	8.64	1.09	1.38	0.14		994	361	29	219		74	88	18		5.8		83	18	671	28	298					10.2	20.56	2.56	11.47	3.32	1.12	3.4	0.61	3.7	0.73	2.02	0.26	1.51	0.23
CT1/P20-AVL	Vestfjella	VF1	CT1-HTh	Luttinen & Furnes 2000	55.8	1.35	14.63	10	0.16	5.05	7.64	2.71	2.39	0.16		69	33	29	291		117	93	21		6.8		150	31	667	78	251
CT1/P21-AVL	Vestfjella	VF1	CT1-HTh	Luttinen & Furnes 2000	53.98	1.19	15.41	9.62	0.17	6.1	9.09	2.34	1.8	0.22	2.29	132	85	30	237		64	87	22	0.42	8.1	3.2	137	26	782	41	599	0.32	0.38	1.58	5.72	19.89	38.47	4.56	19.33	4.95	1.53	4.75	0.84	5.06	0.99	2.69	0.36	2.14	0.33
CT1/P22-AVL	Vestfjella	VF1	CT1-HTh	Luttinen & Furnes 2000	53.28	1.14	15.08	9.94	0.17	6.44	9.43	3.22	0.99	0.21		153	77	33	253		69	94	21		7.4		132	25	378	23	632
CT1/P23-AVL	Vestfjella	VF1	CT1-HTh	Luttinen & Furnes 2000	55.32	0.97	14.62	8.99	0.15	8.97	6.89	1.97	1.9	0.14	3.31	435	143	16	214		74	90	22	0.37	6.59	2.38	98	21	762	41	344		0.61	2.66	4	15.34	27.94	3.16	13.25	3.66	1.22	3.82	0.68	4.19	0.81	2.22	0.28	1.71	0.26
CT1/P32-AVL	Vestfjella	VF1	CT1-HTh	Luttinen & Furnes 2000	53.63	1.12	15.31	9.14	0.16	7.47	9.52	2.42	0.93	0.2		263	89	18	248		107	88	17		7.3		108	21	399	22	484
CT1/P33-AVL	Vestfjella	VF1	CT1-HTh	Luttinen et al. 1998	52.61	1.2	15.46	9.88	0.16	7.24	9.49	2.53	1.13	0.21	2.61	252	86	19	257		116	83		0.32	6.62	2.85	114	22	483	22	431		0.24	1.23	3.75	16.63	33.18		17.14	4.44	1.48	4.42	0.75					1.84	0.28
CT1/P34-AVL	Vestfjella	VF1	CT1-HTh	Luttinen & Furnes 2000	53.44	1.14	15.33	9.15	0.16	7.53	9.53	2.48	0.95	0.2		260	86	28	260		110	88	20		8.1		110	20	401	24	481
CT1/P35-AVL	Vestfjella	VF1	CT1-HTh	Luttinen & Furnes 2000	52.7	1.14	15.18	9.39	0.17	8.1	9.76	2.81	0.46	0.2		320	113	27	267		96	86	24		6.8		117	20	444	6	642
CT1/P36-AVL	Vestfjella	VF1	CT1-HTh	Luttinen & Furnes 2000	53.06	1.11	15.31	9.11	0.15	7.57	9.74	2.98	0.68	0.2		266	91	25	257		96	84	22		7.3		110	21	363	14	553
CT1/P38-AVL	Vestfjella	VF1	CT1-HTh	Luttinen & Furnes 2000	51.8	1.1	16.91	9.08	0.15	6.34	9.97	3.11	1.25	0.19		254	96	25	244		96	79	18		6.6		117	21	546	33	972
CT1/P39-AVL	Vestfjella	VF1	CT1-HTh	Luttinen & Furnes 2000	52.22	1.02	16.99	8.62	0.14	6.77	9.17	3.29	1.51	0.18		275	104	25	230		127	74	23		6.7		113	19	505	42	947
CT1/P40-AVL	Vestfjella	VF1	CT1-HTh	Luttinen & Furnes 2000	52.16	1.03	16.87	8.83	0.14	6.78	9.11	3.31	1.5	0.19	2.62	259	102	28	235		122	76	21	0.25	5.15	2.26	113	18	509	42	954		0.19	0.88	3.38	13.82	27.41	3.37	14.57	3.76	1.31	3.68	0.63	3.82	0.74	2.02	0.26	1.55	0.23
CT1/P41-AVL	Vestfjella	VF1	CT1-HTh	Luttinen & Furnes 2000	52.64	1.08	17.08	8.51	0.15	6.66	10.01	2.61	0.98	0.2		253	108	21	244		100	76	20		5.9		108	18	467	26	619
CT1/P42-AVL	Vestfjella	VF1	CT1-HTh	Luttinen & Furnes 2000	52.52	1.26	15.12	10.4	0.17	6.77	9.83	2.45	1.15	0.23		252	84	31	272		113	90	20	0.32	6.64	2.81	122	24	986	23	680		0.25	1.13	3.46	17.22	34.42	4.2	18.04	4.72	1.57	4.65	0.79	4.75	0.95	2.48	0.33	1.96	0.3
CT1/P48-AVL	Vestfjella	VF1	CT1-HTh	Luttinen & Furnes 2000	53.2	1.45	14.74	10.39	0.19	6.57	9.29	2.59	1.22	0.26	2.83	322	82	37	321		144	107	22	0.35	7.18	3.06	134	26	557	24	627	0.51	0.27	1.19	2.84	17.76	35.71	4.37	19.41	5.07	1.64	5.03	0.85	5.21	1.01	2.63	0.34	2.07	0.3
CT1/P49-AVL	Vestfjella	VF1	CT1-HTh	Luttinen & Furnes 2000	52.07	1.39	14.45	11.08	0.18	6.4	10.18	2.79	1.12	0.24		295	76	33	296		137	99	25		8.1		127	26	525	23	555
CT1/P50-AVL	Vestfjella	VF1	CT1-HTh	Luttinen & Furnes 2000	51.94	1.37	14.51	10.78	0.18	7.9	9.15	2.8	1.02	0.24	2.02	356	142	34	304		142	103	25	0.39	7.64	3.41	128	25	538	20	593	0.35	0.3	1.33	4.1	19.64	39.06	4.7	21.1	5.57	1.82	5.43	0.94	5.63	1.11	2.95	0.37	2.24	0.34
CT1/P51-AVL	Vestfjella	VF1	CT1-HTh	Luttinen & Furnes 2000	52.66	1.19	15.57	10.24	0.18	7.02	8.65	3.19	1	0.2		295	97	32	268		79	88	21		7.7		114	24	355	28	631
CT1/P52-AVL	Vestfjella	VF1	CT1-HTh	Luttinen & Furnes 2000	52.47	1.23	14.59	10.67	0.18	6.92	9.8	3.28	0.54	0.21		294	85	33	292		131	98	20		8		122	24	248	12	651
CT1/P56-AVL	Vestfjella	VF1	CT1-HTh	Luttinen & Furnes 2000	56.4	1.84	13.65	11.39	0.17	4.27	7.23	3.17	1.45	0.31		46	29	29	292		57	116	27		12.9		183	35	596	38	455
CT1/P57-AVL	Vestfjella	VF1	CT1-HTh	Luttinen et al. 1998	53.35	1.04	14.91	9.82	0.15	7.92	8.74	2.91	0.9	0.15	2.67	375	136	37	261		92	89		0.25	4.68	2.22	94	21	373	27	539		0.19	1.03	1.95	10.74	21.65		12.17	3.56	1.18	3.78	0.68					1.76	0.27
CT1/P58-AVL	Vestfjella	VF1	CT1-HTh	Luttinen & Furnes 2000	55.74	1.79	13.98	10.97	0.17	4.62	7.6	2.92	1.8	0.3		54	27	33	292		47	114	25		10.4		179	35	409	55	421
CT1/P59-AVL	Vestfjella	VF1	CT1-HTh	Luttinen & Furnes 2000	53.14	0.95	14.89	9.5	0.16	7.06	10.97	2.62	0.49	0.13	3.28	309	111	34	259		112	84	23	0.24	4.19	1.97	80	19	79	15	298		0.2	1.01	2.72	9.43	18.81	2.33	10.46	3.17	1.11	3.45	0.63	3.93	0.77	2.09	0.28	1.67	0.25
CT1/P61-AVL	Vestfjella	VF1	CT1-HTh	Luttinen & Furnes 2000	53.83	1.23	15	10.11	0.17	6.2	9.38	2.43	1.32	0.23	2.38	164	66	32	262		81	99	17	0.44	8.36	3.31	132	26	515	29	386	0.33	0.36	1.51	4.41	20.75	40.55	4.77	20.01	4.99	1.58	4.98	0.86	5.26	1.05	2.87	0.37	2.22	0.33
CT1/P62-AVL	Vestfjella	VF1	CT1-HTh	Luttinen & Furnes 2000	54.54	1.35	14.62	9.68	0.16	6.38	8.4	2.53	1.91	0.33		200	81	27	222		44	100	24		14		238	32	1163	32	812
CT1/P63-AVL	Vestfjella	VF1	CT1-HTh	Luttinen & Furnes 2000	52.62	0.96	12.42	9.86	0.17	12.59	8.48	2.03	0.62	0.16		930	330	31	202		77	94	17		4.7		87	20	199	11	218
CT1/P64-AVL	Vestfjella	VF1	CT1-HTh	Luttinen & Furnes 2000	54.38	1.03	15.27	9.35	0.15	6.59	8.92	2.64	1.41	0.16	3.95	232	79	35	227		40	89	20	0.32	5.84	3.38	127	26	328	55	358	0.69	0.43	1.91	4.93	13.9	27.87	3.45	15.65	4.41	1.55	4.65	0.83	5.1	1.03	2.8	0.37	2.28	0.34
CT1/P65-AVL	Vestfjella	VF1	CT1-HTh	Luttinen & Furnes 2000	54.47	1.15	14.77	9.76	0.16	6.16	8.5	3.05	1.75	0.13		118	46	30	284		101	92	21		4.8		135	26	562	72	515
CT1/P66-AVL	Vestfjella	VF1	CT1-HTh	Luttinen & Furnes 2000	52.65	1.4	14.57	10.63	0.17	6.58	10.27	2.47	0.89	0.25		303	81	39	299		188	104	21		7.1		126	26	360	16	504
CT1/P68-AVL	Vestfjella	VF1	CT1-HTh	Luttinen & Furnes 2000	53.52	1.03	14.94	9.78	0.17	7.16	9.88	2.29	1	0.14		290	93	43	252		102	86	21		5		87	21	215	27	415
CT1/P69-AVL	Vestfjella	VF1	CT1-HTh	Luttinen & Furnes 2000	54.13	1.05	14.78	9.67	0.17	6.71	8.94	2.94	1.37	0.17	2.75	138	107	23	243		92	86	19	0.34	6.19	2.66	105	22	533	38	477		0.33	1.63	3.87	15.73	30.33	3.54	15.02	4.06	1.31	4.12	0.71	4.51	0.92	2.47	0.33	1.93	0.29
CT1/P6-AVL	Vestfjella	VF1	CT1-HTh	Luttinen & Furnes 2000	54.83	1.27	14.09	9.9	0.16	5.82	8.84	3.36	1.41	0.22	4.13	222	55	27	263		80	88	24	0.39	7.34	3.37	130	28	599	41	270	0.13	0.39	1.82	4.56	19.01	37.43	4.49	19.16	5.07	1.58	5.05	0.9	5.46	1.05	2.92	0.38	2.29	0.34
CT1/P70-AVL	Vestfjella	VF1	CT1-HTh	Luttinen & Furnes 2000	53.16	1.03	14.95	9.93	0.17	7.22	9.95	2.34	1.01	0.14		292	95	31	252		112	87			6.9		88		225	28	422
CT1/P7-AVL	Vestfjella	VF1	CT1-HTh	Luttinen & Furnes 2000	54.29	1.31	14.68	9.48	0.15	6.72	7.83	3.22	2	0.22		248	63	27	272		71	96	21		8		133	29	956	54	297
CT1/P9-AVL	Vestfjella	VF1	CT1-HTh	Luttinen & Furnes 2000	55.71	1.32	14.46	10.12	0.16	5.28	7.56	2.74	2.37	0.16		74	45	31	288		125	95	21		8.5		147	30	661	80	247
CT1/VF-19-85	Vestfjella	VF1	CT1-HTh	Luttinen & Furnes 2000	54.3951	1.20277	15.8865	10.4841	0.170392	5.18192	9.28135	1.7841	1.4333	0.180415	2.89	94	77		219	43	84	100					124	24	657	38	302
CT1/VF-20-85	Vestfjella	VF1	CT1-HTh	Luttinen & Furnes 2000	54.0627	1.20228	16.3511	9.70845	0.180343	4.96944	10.9107	1.58301	0.781485	0.250476	3.73	103	71		235	44	88	102					137	26	389	13	274
CT1/VF-21-85	Vestfjella	VF1	CT1-HTh	Luttinen & Furnes 2000	53.9633	1.20253	16.3844	9.89077	0.150316	4.52951	10.5021	2.01423	1.1424	0.220463	1.62	86	66		213	40	87	89					132	26	501	20	285
CT1/VF-41-85	Vestfjella	VF1	CT1-HTh	Luttinen & Furnes 2000	53.1766	1.42071	15.2776	10.2951	0.18009	6.28314	10.9055	1.72086	0.54027	0.2001	3.21	198	50		261	47	75	105					139	26	254	11	264
CT1/VF-42-85	Vestfjella	VF1	CT1-HTh	Luttinen & Furnes 2000	53.2526	1.42114	15.4624	10.4584	0.170136	6.40512	10.0681	1.85148	0.680544	0.230184	3.4	217	59		261	47	70	106					142	27	384	14	334
CT1/VF-43-85	Vestfjella	VF1	CT1-HTh	Luttinen & Furnes 2000	53.8177	1.42099	15.4008	10.027	0.170119	6.69469	10.3172	1.60112	0.350245	0.20014	4.12	214	62		252	46	72	106					143	26	245	4	294
CT1/VF57-85	Vestfjella	VF1	CT1-HTh	Luttinen & Furnes 2000	53.36	1.38	14.97	9.71	0.17	5.99	10.5	2.58	1.07	0.27	1.77	234	65	28	277		95	95	20	0.44	8.05	3.53	137	28.7	508	17	349		0.38	1.6	4.27	20.43	41.76	5.01	21.99	5.44	1.79	5.64	0.91	5.63	1.1	2.79	0.39	2.24	0.34
CT1/VF-57-85	Vestfjella	VF1	CT1-HTh	Luttinen & Furnes 2000	53.8269	1.37247	15.0571	9.92787	0.160289	6.04087	10.3787	1.9435	1.06191	0.230415	1.77	253	78		242	43	91	106					146	27	561	16	317
CT1/VF-74-85	Vestfjella	VF1	CT1-HTh	Luttinen & Furnes 2000	53.5693	1.41368	18.3678	12.9938	0.160417	6.55705	3.19832	2.60678	0.982555	0.150391	4.34	145	75		373	58	97	113					175	28	323	22	123
CT1/VF-75-85	Vestfjella	VF1	CT1-HTh	Luttinen & Furnes 2000	54.4096	1.22404	14.6283	11.1568	0.170563	5.68877	8.57831	1.99659	2.01665	0.13043	2.7	119	59		246	42	84	93					138	27	856	62	333
CT1/VF76-85	Vestfjella	VF1	CT1-HTh	Luttinen & Furnes 2000	55.29	1.244	14.48	9.95	0.168	5.85	8.79	2.22	1.87	0.151	2.12	137	45	29	262		104	89	20	0.36	5.51	3.79	135	27	531	52	310		0.47	1.83	4.67	13.89	28.67	3.72	16.9	4.79	1.52	5.39	0.94	5.71	1.14	2.94	0.4	2.41	0.36
CT1/VF-77-85	Vestfjella	VF1	CT1-HTh	Luttinen & Furnes 2000	55.9354	1.27331	14.7183	11.0788	0.180469	5.36395	8.36174	2.1556	0.782033	0.150391	3.15	99	53		270	42	103	104					157	28	414	20	123
CT1/VF-78-85	Vestfjella	VF1	CT1-HTh	Luttinen & Furnes 2000	55.9133	1.34417	15.6987	11.1145	0.190591	5.6776	7.41298	1.73538	0.762363	0.150466	3.57	119	57		261	46	102	113					166	27	287	17	100
CT1/VF-79-85	Vestfjella	VF1	CT1-HTh	Luttinen & Furnes 2000	56.6426	1.00341	13.1246	10.0341	0.150512	8.50893	8.73972	1.25426	0.431467	0.110375	4.35	724	200		183	47	67	109					111	25	175	18	250
CT1/VF80-85	Vestfjella	VF1	CT1-HTh	Luttinen & Furnes 2000	54.77	1.129	14.75	9.52	0.155	7.03	8.23	3.06	1.2	0.155	3.08	297	92	26	239		90	86	21	0.35	5.29	2.79	108	23	387	36	328		0.41	1.72	3.15	13.98	27.22	3.37	14.64	4.16	1.33	4.54	0.78	4.8	0.94	2.46	0.34	2.01	0.31
CT1/P37-AVL	Vestfjella	VF1	CT1-LTh	Luttinen & Furnes 2000	53.27	1.43	15.05	10.28	0.17	6.25	9.64	2.28	1.35	0.19	2.93	172	36	31	288		96	90	25	0.33	6.02	3.3	126	25	1029	25	401		0.17	0.47	4.31	10.62	23.01	3.08	14.28	4.28	1.62	4.64	0.83	5.01	0.99	2.66	0.36	2.07	0.32
CT1/P43-AVL	Vestfjella	VF1	CT1-LTh	Luttinen & Furnes 2000	53.63	1.46	15.4	9.6	0.17	6.15	8.37	3.31	1.6	0.21		185	35	36	276		85	88	20		7.2		135	25	1081	32	613
CT1/P44-AVL	Vestfjella	VF1	CT1-LTh	Luttinen & Furnes 2000	53.21	1.53	14.87	10.38	0.17	6.36	10.09	2.45	0.61	0.23	2.52	184	32	31	291		113	100	23	0.36	6.4	3.52	133	26	369	13	361		0.19	0.51	2.78
CT1/P45-AVL	Vestfjella	VF1	CT1-LTh	Luttinen & Furnes 2000	53.84	1.49	15.14	9.77	0.17	6.56	8.9	2.44	1.38	0.22	2.95	181	37	29	293		75	97	22	0.34	6.24	3.34	134	25	773	34	494		0.16	0.44	3.4	12.34	26.09	3.43	16.21	4.82	1.71	4.92	0.86	5.31	1.07	2.89	0.38	2.21	0.33
CT1/P46-AVL	Vestfjella	VF1	CT1-LTh	Luttinen & Furnes 2000	52.78	1.38	14.2	10.87	0.18	6.71	9.61	3.01	0.92	0.24		306	80	30	291		113	90	19		8.5		128	25	382	25	621					11.93	25.4	3.37	15.87	4.59	1.65	4.83	0.84	5.14	1.02	2.78	0.36	2.12	0.33
CT1/P47-AVL	Vestfjella	VF1	CT1-LTh	Luttinen & Furnes 2000	53.94	1.33	14.5	9.91	0.17	6.55	9.23	2.84	1.19	0.22		294	84	37	295		114	94	20		7		121	23	676	30	497
CT1/sk224-AVL	Vestfjella	VF1	CT1-LTh	Luttinen & Furnes 2000	53.91	1.47	15.19	9.12	0.17	6.23	9.51	2.42	1.74	0.23	2.16	198	44	29	268		67	86	23	0.35	6.42	3.37	132	25	821	25	436		0.17	0.48	3.59	12.52	26.46	3.5	16.43	4.72	1.67	5.18	0.85	5.12	1.05	2.63	0.37	2.18	0.33
CT1/up206-AVL	Vestfjella	VF1	CT1-LTh	Luttinen & Furnes 2000	51.51	1.63	14.54	11.69	0.19	6.51	11.34	2.16	0.18	0.25	1.12	268	67	34	325		109	95	22	0.26	5.1	3.8	153	28	173	2	251		0.11	0.38	2.19	9.16	20.56	2.94	14.45	4.38	1.83	5.14	0.87	5.22	1.07	2.7	0.39	2.25	0.33
CT1/VF147-85	Vestfjella	VF1	CT1-LTh	Luttinen & Furnes 2000	54.32	1.421	14.94	9.67	0.172	6.21	9.55	2.2	1.31	0.205	2.23	166	43	29	271		91	84	20	0.32	5.12	3.13	120	24	772	21	350		0.15	0.44	2.61	9.96	21.62	2.92	13.79	4.05	1.51	4.65	0.8	4.77	0.96	2.41	0.33	1.9	0.29
CT1/VF-148-85	Vestfjella	VF1	CT1-LTh	Luttinen & Furnes 2000	52.7054	1.45291	15.1503	10.8818	0.170341	6.0521	9.86974	2.08417	1.41283	0.220441	1.71	184	55		245	43	112	121					130	24	537	23	322
CT1/VF-16-85	Vestfjella	VF1	CT1-LTh	Luttinen & Furnes 2000	54.0549	1.49179	14.4974	11.8642	0.190228	6.12735	8.66039	2.12255	0.790949	0.20024	2.31	117	68		301	48	116	100					126	26	460	18	334
CT1/VF-17-85	Vestfjella	VF1	CT1-LTh	Luttinen & Furnes 2000	54.3788	1.63327	13.8477	12.5952	0.200401	5.41082	8.80762	1.72345	1.18236	0.220441	3.93	71	61		336	52	150	127					130	27	606	27	317
CT1/VF26-85	Vestfjella	VF1	CT1-LTh	Luttinen & Furnes 2000	52.75	1.56	15.08	10.43	0.18	5.95	10.83	2.58	0.43	0.23		191	34	34	307		85	96	23	0.35	6.03	3.5	131	27.95	311	6.3	379		0.17	0.54	4.03	12.05	26.39	3.45	16.35	4.62	1.73	5.17	0.89	5.55	1.1	2.8	0.39	2.26	0.34
CT1/VF30-85	Vestfjella	VF1	CT1-LTh	Luttinen & Furnes 2000	53.27	1.46	15.58	10.96	0.19	6.31	7.58	3.56	0.85	0.24	3.53	195	45	28	276		77	94	22	0.37	5.85	3.56	135	26	421	16	255		0.17	0.53	3.07	12.26	26.3	3.43	16.18	4.69	1.64	5.22	0.86	5.2	1.04	2.68	0.36	2.16	0.33
CT1/VF40-85	Vestfjella	VF1	CT1-LTh	Luttinen & Furnes 2000	53.56	1.448	14.73	10.4	0.172	5.84	10.69	2.16	0.77	0.224	3.38	170	34	34	286		73	90	21	0.34	5.26	3.36	127	25	327	14	278		0.16	0.47	3.36	10.67	22.81	3.18	14.94	4.42	1.53	4.87	0.83	5.11	1.01	2.65	0.36	2.16	0.33
CT1/VF44-85	Vestfjella	VF1	CT1-LTh	Luttinen & Furnes 2000	53.57	1.57	14.86	10.23	0.17	5.44	10.68	2.39	0.84	0.26		160	22	29	289		89	101	22	0.42	7.07	4.27	165	30.21	327	16.1	311		0.2	0.73	4.74	14.2	31.18	4.03	18.76	5.2	1.75	5.8	0.97	5.83	1.17	3.01	0.42	2.44	0.37
CT1/VF46-85	Vestfjella	VF1	CT1-LTh	Luttinen & Furnes 2000	53.21	1.51	14.85	10.75	0.17	5.64	10.18	2.39	1.06	0.25	4.77	165	32	31	288		70	99	21	0.37	6.04	3.65	142	25	330	20	302		0.18	0.59	4.19	12.35	26.62	3.59	16.41	4.81	1.66	5.29	0.98	5.21	1.04	2.72	0.37	2.19	0.33
CT1/VF-47-85	Vestfjella	VF1	CT1-LTh	Luttinen & Furnes 2000	53.8539	1.41141	15.1752	10.2703	0.18018	6.57658	10.2002	1.5015	0.560561	0.27027	4.42	210	64		268	48	75	108					145	25	542	9	307
CT1/VF-48-85	Vestfjella	VF1	CT1-LTh	Luttinen & Furnes 2000	53.5162	1.50623	15.611	10.8329	0.179551	5.61596	10.5636	1.39651	0.528678	0.249377	5.69	191	37		281	46	86	108					169	27	323	13	287
CT1/VF-55-85	Vestfjella	VF1	CT1-LTh	Luttinen & Furnes 2000	54.0711	1.36204	15.2328	9.97496	0.18027	6.0691	9.70456	2.29344	0.881322	0.230346	2.64	257	84		232	45	60	108					130	25	428	18	475
CT1/VF81-85	Vestfjella	VF1	CT1-LTh	Luttinen & Furnes 2000	53.15	1.498	15.12	10.07	0.175	6.1	9.23	2.15	2.27	0.239	2.86	198	43	27	261		73	88	20	0.36	5.75	3.48	132	26	1463	39	359		0.17	0.49	3.26	12.33	26.24	3.5	16.14	4.52	1.66	5.11	0.87	5.14	1.04	2.62	0.36	2.18	0.33
CT1/VF-82-85	Vestfjella	VF1	CT1-LTh	Luttinen & Furnes 2000	53.3734	1.42142	15.5756	10.0601	0.17017	6.62663	9.21922	1.67167	1.63163	0.25025	2.4	202	56		246	44	41	99					131	26	1252	38	405
CT1/VF-83-85	Vestfjella	VF1	CT1-LTh	Luttinen & Furnes 2000	53.6583	1.38124	15.7642	10.2592	0.170153	6.05545	9.07817	1.94175	1.51136	0.180162	2.88	203	54		255	45	93	99					120	24	963	30	382
CT2/B11-AVL	Vestfjella	VF2	CT2	Luttinen & Furnes 2000	50.26	3.53	13.13	14.95	0.17	4.73	10.14	2.41	0.22	0.3	2.34	126	83	37	425		245	144	31		9.5		197	48	137	1	279
CT2/B16-AVL	Vestfjella	VF2	CT2	Luttinen et al. 1998	50.79	1.59	11.16	12.36	0.18	11.67	9.87	1.9	0.22	0.12	4.22	702	328	29	308		150	116		0.22	3.51	2.58	92	27	79	5	244		0.17	0.62	1.6	7.01	16.5		11.23	3.7	1.4	4.34	0.83					2.02	0.31
CT2/B2b-AVL	Vestfjella	VF2	CT2	Luttinen & Furnes 2000	54.66	2.24	13.59	11.88	0.17	5.07	7.36	3.78	0.93	0.19	3.2	63	66	29	372		72	113	29	0.39	5.52	3.65	142	31	301	26	598	0.19	0.48	1.83	3	13.74	29.01	3.68	17.02	5.13	1.87	5.69	1.07	6.48	1.24	3.38	0.42	2.43	0.36
CT2/B33-AVL	Vestfjella	VF2	CT2	Luttinen & Furnes 2000	54.54	2.4	13.35	11.95	0.16	5.14	7.81	3.03	1.3	0.21	2.29	79	77	28	349		112	118	25	0.43	6.81	4.16	155	35	295	36	502		0.51	2.25	4	17.28	36.38	4.57	20.64	6.12	2.09	6.66	1.21	7.05	1.38	3.62	0.44	2.59	0.37
CT2/B35-AVL	Vestfjella	VF2	CT2	Luttinen et al. 1998	54.09	1.6	11.84	10.88	0.16	10.21	8.43	1.65	0.87	0.17	2.19	609	251	28	253		96	98		0.41	6.64	3.11	113	26	237	17	240		0.2	1.37	3.14	11.79	24.84		15.3	4.91	1.79	5.27	0.94					2	0.28
CT2/B400-AVL	Vestfjella	VF2	CT2	Luttinen et al. 1998	53.39	1.68	11.55	10.79	0.16	11.7	8.19	1.58	0.7	0.16	2.3	721	361	30	274		107	99		0.32	4.69	3.07	113	27	223	15	269		0.38	1.58	2.68	10.99	23.65		15.55	5.23	1.83	5.53	0.97					2.03	0.29
CT2/B408-AVL	Vestfjella	VF2	CT2	Luttinen & Furnes 2000	53.97	2.46	13.43	12.67	0.16	4.76	8.05	2.75	1.4	0.22	3.38	75	74	33	357		93	114	25	0.44	7	4.49	165	37	417	36	517	0.39	0.5	2.31	4	17.52	36.53	4.67	21.45	6.26	2.15	6.83	1.23	7.42	1.41	3.72	0.46	2.69	0.37
CT2/B409-AVL	Vestfjella	VF2	CT2	Luttinen & Furnes 2000	53.89	2.33	13.6	11.96	0.16	5.22	8.45	3.21	0.85	0.2	2.05	77	87	36	343		130	120	25		8.6		149	32	186	23	481
CT2/B4-AVL	Vestfjella	VF2	CT2	Luttinen & Furnes 2000	54.67	2.24	13.75	11.15	0.17	5.08	8.29	3.84	0.51	0.18	2.75	68	72	31	387		96	113	30	0.37	5.32	3.39	124	31	120	11	216	0.05	0.45	1.7	3	13.31	27.91	3.59	16.53	5.02	1.91	5.48	1.01	6.09	1.2	3.27	0.4	2.36	0.35
CT2/B56-AVL	Vestfjella	VF2	CT2	Luttinen & Furnes 2000	50.26	3.07	13.25	14.44	0.18	5.56	9.35	3.29	0.2	0.26		122	98	41	401		202	144	37		8.7		171	43	86	4	268
CT2/B65-AVL	Vestfjella	VF2	CT2	Luttinen et al. 1998	51.08	2.37	14.1	13.05	0.17	6.24	8.9	3.08	0.68	0.2	3.28	194	134	29	353		3	119		0.37	6	4.05	146	37	157	21	494		0.3	1.32	2.51	12.73	28.5		18.08	5.81	2.14	6.52	1.2					2.7	0.39
CT2/B66-AVL	Vestfjella	VF2	CT2	Luttinen et al. 1998	51.07	3.08	13.21	14.03	0.16	5.47	9.08	2.96	0.54	0.26		110	100	28	409		216	146		0.45	6.8	4.93	177	45	136	21	406		0.37	1.58	3.56	15.66	35.75		23.4	7.41	2.55	8.52	1.54					3.3	0.45
CT2/B67-AVL	Vestfjella	VF2	CT2	Luttinen & Furnes 2000	50.68	3.46	13.13	14.56	0.17	4.88	9.84	2.49	0.34	0.29	2.79	119	74	29	430		195	144	32	0.49	7.48	5.46	191	50	157	5	264		0.41	1.58	4	17.82	40.47	5.55	26.93	8.32	2.9	9.74	1.71	10.25	1.96	5.17	0.63	3.67	0.53
CT2/B6-AVL	Vestfjella	VF2	CT2	Luttinen & Furnes 2000	50.2	3.09	12.71	15.54	0.19	5.6	9.1	2.4	0.79	0.23	2.53	113	109	46	416		239	149	32		8.4		167	40	146	19	339
CT2/B82-AVL	Vestfjella	VF2	CT2	Luttinen & Furnes 2000	52.99	1.7	11.05	11.64	0.18	11.65	8.75	1.65	0.14	0.13		781	317	32	316		165	107	20		5.8		102	24	40	4	246			1.02
CT2/P13-AVL	Vestfjella	VF2	CT2	Luttinen & Furnes 2000	51.05	3.17	13.08	14.12	0.19	5.79	9.19	2.35	0.67	0.26		109	107	35	406		176	146		0.36	5.43	4.23	175	44	293	18	356		0.41	1.4	3.16	15.53	34.58		22.52	7.11	2.42	8.14	1.47					3.25	0.47
CT2/P18-AVL	Vestfjella	VF2	CT2	Luttinen & Furnes 2000	53.23	2.56	13.3	13.28	0.17	5.24	7.86	2.86	1.14	0.22	2.45	60	79	30	379		108	127	30	0.41	6.55	4.07	168	35	334	27	536		0.45	1.96	3.79	15.56	33.53	4.3	19.85	5.92	2.07	6.64	1.22	7.28	1.36	3.69	0.47	2.68	0.39
CT2/P3-AVL	Vestfjella	VF2	CT2	Luttinen & Furnes 2000	50.22	3.13	12.25	14.94	0.18	6.64	9.98	2.05	0.2	0.26	3.14	220	154	34	402		188	148	27	0.44	6.86	4.81	173	42	107	4	295	0.62	0.34	1.42	4.05
CT2/P4-AVL	Vestfjella	VF2	CT2	Luttinen & Furnes 2000	50.95	3.03	12.94	14.58	0.17	5.85	8.45	3.41	0.21	0.25		202	116	28	390		195	132	26		8.2		166	42	154	5	224
CT2/P54-AVL	Vestfjella	VF2	CT2	Luttinen & Furnes 2000	53.87	2.25	13.67	11.98	0.17	5.21	8.63	2.52	1.39	0.2		66	52	29	368		98	130	26		7.3		138	31	642	35	410			2
CT2/P55-AVL	Vestfjella	VF2	CT2	Luttinen & Furnes 2000	52.78	2.18	12.71	11.26	0.17	7.35	9.89	2.55	0.91	0.19		305	110	29	378		105	99	23	0.44	6.73	3.83	139	25.12	169	18.8	445		0.27	1.52	3.06	14.91	34.56	4.36	20.77	5.48	1.88	5.49	0.89	5.21	1.02	2.44	0.33	1.87	0.26
CT2/P5-AVL	Vestfjella	VF2	CT2	Luttinen & Furnes 2000	50.74	3.31	12.9	14.14	0.18	5.58	9.51	3.02	0.22	0.26		194	99	30	419		191	144	28		9.2		176	42	97	4	334
CT2/VF-144-85	Vestfjella	VF2	CT2	Luttinen & Furnes 2000	50.9529	1.61484	14.1023	11.6249	0.170512	7.2317	12.016	1.93581	0.200602	0.150451	1.77	209	83		291	46	121	107					95	24	147	4	202
CT2/VF51-85	Vestfjella	VF2	CT2	Luttinen & Furnes 2000	55.09	2.25	13.12	12.49	0.17	4.68	8.08	2.86	1.06	0.2	1.92	55	62	24	371		103	114	22	0.44	6.2	3.73	140	30	207	28	459		0.49	1.92	3.85	14.49	30.93	3.82	17.37	5.26	1.9	6.34	1.06	6.51	1.29	3.13	0.43	2.55	0.37
CT2/VF-53-85	Vestfjella	VF2	CT2	Luttinen & Furnes 2000	55.0957	2.27478	13.5885	12.7067	0.180379	4.82012	7.89658	2.27478	0.982062	0.180379	1.92	73	81		354	47	95	124					116	27	311	33	412
CT2/VF-71-85	Vestfjella	VF2	CT2	Luttinen & Furnes 2000	59.8012	2.49046	12.5326	11.3376	0.120506	3.44447	5.36252	1.9281	2.80177	0.180759	2.15	130	77		298	35	150	115					178	36	670	60	232
CT2/VF72-85	Vestfjella	VF2	CT2	Luttinen & Furnes 2000	50.49	3.08	13.06	14.77	0.166	5.29	9.61	2.39	0.89	0.257	3	115	110	26	383		146	140	28	0.48	6.74	5.13	173	43	239	18	357		0.73	1.53	3.46	14.94	33.83	4.69	22.83	7.3	2.52	8.66	1.5	9.19	1.76	4.33	0.58	3.3	0.47
CT2/VF-73-85	Vestfjella	VF2	CT2	Luttinen & Furnes 2000	51.0741	3.17205	13.2704	15.0472	0.200763	6.02289	8.54246	2.13812	0.311182	0.220839	2.99	170	134		413	63	191	153					160	37	101	10	369
CT3/B401-AVL	Vestfjella	VF3	CT3	Luttinen et al. 1998	52.25	1.71	14.46	11.31	0.18	6.73	9.37	3.01	0.64	0.22	2.23	173	55	27	345		133	100		0.22	3.74	2.4	98	26	444	17	524		0.11	0.37	1.58	6.82	15.46		11.61	3.95	1.51	4.72	0.87					2.18	0.32
CT3/B402-AVL	Vestfjella	VF3	CT3	Luttinen & Furnes 2000	52.18	1.69	14.52	11.37	0.18	6.67	9.52	2.86	0.68	0.21	2.68	169	57	41	348		119	97	21		4.9		98	26	527	13	543
CT3/B403-AVL	Vestfjella	VF3	CT3	Luttinen et al. 1998	51.12	1.36	14.79	10.79	0.17	7.69	10.89	2.52	0.43	0.14	2.65	270	83	41	309		148	91		0.17	3.09	1.93	81	22	245	12	428		0.11	0.39	1.28	5.65	12.58		9.09	3.12	1.25	3.89	0.71					1.75	0.26
CT3/B404-AVL	Vestfjella	VF3	CT3	Luttinen & Furnes 2000	51.15	1.34	14.62	10.7	0.16	7.63	11.53	2.13	0.5	0.14	3.55	287	82	41	332		121	81	23		3.9		76	21	119	14	342
CT3/P12-AVL	Vestfjella	VF3	CT3	Luttinen & Furnes 2000	52.55	1.409	14.47	10.32	0.17	6.66	9.84	2.59	1.7	0.18	3.79	273	73	29	308		99	88	19		4.2		89	24	568	34	306			0	6	13	21
CT3/P14-AVL	Vestfjella	VF3	CT3	Luttinen & Furnes 2000	53.05	1.4	14.76	10.28	0.18	7.12	9.14	2.63	1.16	0.17	2.72	270	68	28	306		108	86	23	0.2	3.68	2.16	91	25	386	33	367	0.29	0.13	0.46	1.55	7.57	16.24	2.23	10.99	3.56	1.34	4.12	0.76	4.69	0.93	2.51	0.33	1.92	0.29
CT3/P15-AVL	Vestfjella	VF3	CT3	Luttinen & Furnes 2000	52.27	1.39	14.19	10.33	0.17	7.26	10.04	2.83	1.24	0.17		323	65	35	295		101	85	23		3.6		93	23	677	27	496
CT3/P16-AVL	Vestfjella	VF3	CT3	Luttinen & Furnes 2000	50.44	1.47	15.58	11.31	0.17	7.41	9.87	2.29	1.13	0.21	3.06	293	87	36	307		121	94	26	0.23	4.3	2.08	91	23	672	34	453	0.41	0.11	0.37	1.76	7.43	16.66	2.31	11.35	3.66	1.41	4.07	0.74	4.55	0.89	2.39	0.32	1.82	0.27
CT3/P17-AVL	Vestfjella	VF3	CT3	Luttinen et al. 1998	51.3	1.42	14.13	10.87	0.18	8.27	9.96	2.53	1.01	0.2	2.98	303	118	33	309		117	90		0.22	4.29	2.03	84	21	764	25	413		0.1	0.33	3.56	7.56	16.71		11.37	3.65	1.34	4.13	0.72					1.83	0.28
CT3/P24-AVL	Vestfjella	VF3	CT3	Luttinen & Furnes 2000	51.92	1.46	14.52	11.01	0.18	7.17	10	2.21	1.23	0.18	2.04	296	72	26	307		93	92	19	0.21	3.97	2.31	93	25	601	31	357		0.13	0.52	2.57	8.11	17.95	2.48	12.07	3.85	1.37	4.35	0.8	5.02	0.99	2.66	0.35	2.1	0.32
CT3/P25-AVL	Vestfjella	VF3	CT3	Luttinen & Furnes 2000	51.33	1.54	15.32	11.15	0.18	6.41	10.56	2.41	0.8	0.19	2.44	97	59	30	346		131	91	24	0.18	3.3	2.03	82	23	248	20	357	0.2	0.1	0.34	1.53	5.59	12.83	1.89	9.76	3.34	1.36	4.09	0.75	4.67	0.91	2.52	0.32	1.91	0.28
CT3/P26-AVL	Vestfjella	VF3	CT3	Luttinen et al. 1998	51.42	1.63	15.14	11.47	0.19	6.31	9.61	3.06	0.86	0.2	3.3	107	60	38	333		121	96		0.2	3.6	2.22	97	24	399	23	633		0.11	0.37	1.56	6.06	14.09		10.53	3.52	1.42	4.41	0.8					2	0.31
CT3/P28-AVL	Vestfjella	VF3	CT3	Luttinen & Furnes 2000	52.59	1.49	14.79	10.8	0.18	6.34	8.67	3.01	1.84	0.18		162	54	39	321		96	87	20		4.2		92	23	857	35	640
CT3/P29-AVL	Vestfjella	VF3	CT3	Luttinen & Furnes 2000	52.26	1.64	14.51	11.23	0.18	6.91	8.44	2.78	1.69	0.25	2.1	307	54	44	338		125	90	23	0.22	3.94	2.55	109	25	1169	41	517		0.1	0.28	2.19	7.69	17.49	2.52	12.45	3.95	1.47	4.58	0.83	5.14	1.01	2.74	0.36	2.08	0.33
CT3/P30-AVL	Vestfjella	VF3	CT3	Luttinen et al. 1998	52.35	1.52	15.69	10.46	0.17	6.49	9.25	2.63	1.15	0.19	2.5	152	62	15	313		118	93		0.2	3.79	2.41	97	25	753	26	442		0.09	0.29	1.67	7.01	15.86		11.1	3.68	1.42	4.32	0.77					2.04	0.31
CT3/P31-AVL	Vestfjella	VF3	CT3	Luttinen & Furnes 2000	52.33	1.66	14.86	11.06	0.18	6.18	10.09	2.41	0.93	0.21		153	51	19	325		117	99	24	0.22	4.21	2.64	100	27	424	15	291		0.11	0.36	2.25	7.62	17.07	2.44	12.02	4.01	1.53	4.72	0.87	5.3	1.07	2.89	0.38	2.24	0.33
CT3/P53-AVL	Vestfjella	VF3	CT3	Luttinen et al. 1998	51.65	1.55	14.85	10.73	0.19	7.18	9.72	2.88	0.96	0.19	3.18	273	68	36	340		125	98		0.25	4.4	2.28	98	24	792	21	563		0.11	0.36	1.86	7.81	17.26		11.63	3.71	1.37	4.26	0.79					1.96	0.29
CT3/P60-AVL	Vestfjella	VF3	CT3	Luttinen & Furnes 2000	51.72	1.55	14.75	10.75	0.19	7.19	9.67	2.92	0.98	0.19	3.65	266	63	38	333		110	91	21		4.8		96	22	836	21	567
CT3/P67-AVL	Vestfjella	VF3	CT3	Luttinen & Furnes 2000	51.88	1.53	14.76	10.83	0.17	7.29	9.43	3.16	0.65	0.19		285	66	39	319		112	88	23		5.2		98	24	554	14	600
CT3/sk214-AVL	Vestfjella	VF3	CT3	Luttinen & Furnes 2000	49.83	1.39	12.9	11.3	0.18	12.86	9.86	1.21	0.26	0.2	3.85	744	329	24	288		86	87	19	0.2	3.64	1.92	69	19	104	2	181		0.08	0.29	1.17	6.78	15.13	2.12	10.27	3.19	1.22	3.86	0.67	4.04	0.81	2.13	0.29	1.64	0.24
CT3/sk215-AVL	Vestfjella	VF3	CT3	Luttinen & Furnes 2000	52.16	1.36	13.7	10.17	0.18	9.09	10.74	1.76	0.66	0.19	2.4	426	138	27	272		82	73	18	0.2	3.45	1.84	72	20	360	10	238		0.08	0.27	1.63	6.38	14.13	2.02	9.78	3.18	1.21	3.71	0.66	3.98	0.8	2.06	0.28	1.64	0.24
CT3/sk216-AVL	Vestfjella	VF3	CT3	Luttinen & Furnes 2000	51.12	1.68	15.58	11.04	0.18	6.13	10.5	2.61	0.88	0.28	2	258	74	28	328		117	88	26	0.26	4.68	2.55	100	24	404	18	317		0.11	0.42	2.24	8.65	18.98	2.67	13.08	3.97	1.53	4.77	0.82	4.95	0.97	2.52	0.36	2.07	0.3
CT3/sk217-AVL	Vestfjella	VF3	CT3	Luttinen & Furnes 2000	50.4	1.27	12.28	11.15	0.18	12.28	10.01	1.58	0.64	0.21	3.1	739	291	35	264		87	80	17	0.43	7.91	2.24	88	20	291	8	172	0.02	0.11	0.42	1.44	9.94	20.32	2.65	12.29	3.47	1.28	3.83	0.64	3.98	0.8	2.01	0.27	1.69	0.23
CT3/sk219-AVL	Vestfjella	VF3	CT3	Luttinen & Furnes 2000	48.85	1.38	13.48	10.66	0.18	13.36	10.05	1.7	0.19	0.14		1085	486	35	311		108	82	20	0.13	2.18	1.44	56	17	112	2	195		0.03	0.11	0.71	3.59	8.53	1.32	6.9	2.38	1.04	3.04	0.54	3.27	0.68	1.72	0.23	1.37	0.2
CT3/sk221-AVL	Vestfjella	VF3	CT3	Heinonen et al. 2010	49.2	0.98	8.8	11.89	0.19	16.91	10.41	1.25	0.28	0.1		2115	516	33	293					0.15	2.55	1.36	56	13.69	147	5.5	173		0.06	0.21		4.21	10.19		7.4	2.22	0.83	2.7		2.82	0.56			1.14	0.18
CT3/sk225-AVL	Vestfjella	VF3	CT3	Luttinen & Furnes 2000	48.73	1.2	10.89	12.17	0.19	15.87	9.72	0.83	0.2	0.19	4.43	1391	555	25	270		86	93	13	0.22	3.93	1.67	63	17	98	1	105	0.02	0.07	0.25	0.92	6.96	15.04	2.07	9.9	2.95	1.1	3.48	0.59	3.55	0.73	1.85	0.25	1.47	0.22
CT3/sk226-AVL	Vestfjella	VF3	CT3	Luttinen & Furnes 2000	47.91	1.41	13.26	12.35	0.19	14.19	8.74	1.56	0.16	0.23	4.02	984	410	26	296		100	96	20	0.27	4.74	2.03	74	21	99	1	150	0.01	0.08	0.29	1.27	8.28	18.11	2.47	11.9	3.55	1.53	4.06	0.7	4.22	0.87	2.21	0.29	1.72	0.25
CT3/sk227-AVL	Vestfjella	VF3	CT3	Luttinen & Furnes 2000	49.04	1.45	11.54	11.96	0.21	13.9	10.19	1.2	0.25	0.25		900	362	25	277		76	92	15		6.6		87	22	152	3	154				3
CT3/sk228-AVL	Vestfjella	VF3	CT3	Luttinen & Furnes 2000	48.4	1.25	11.86	12.07	0.21	14.2	10.48	1.29	0.08	0.17	4.26	977	421	28	273		81	90	18	0.22	3.82	1.81	69	18	62		158	0.08	0.07	0.28	1.73	6.45	14.13	1.97	9.33	2.96	1.09	3.49	0.6	3.78	0.76	1.92	0.27	1.58	0.23
CT3/sk229-AVL	Vestfjella	VF3	CT3	Luttinen & Furnes 2000	48.14	1	9.49	13.1	0.2	19.13	7.68	1.02	0.1	0.14	4	1413	642	25	223		66	91	15	0.18	3.13	1.46	56	15	71	3	125	0.82	0.06	0.21	1.35	5.19	11.4	1.6	7.77	2.35	0.89	2.8	0.48	3.01	0.62	1.58	0.22	1.3	0.18
CT3/up201-AVL	Vestfjella	VF3	CT3	Luttinen & Furnes 2000	51.18	1.42	13.88	10.06	0.18	10.21	10.91	1.72	0.24	0.2		626	214	32	301		82	89	19		5.4		79	21	151	2	218			3	1
CT3/up202-AVL	Vestfjella	VF3	CT3	Luttinen & Furnes 2000	52.25	1.26	15.1	9.18	0.17	8.09	11.67	1.99	0.13	0.16		357	94	28	312		94	77	22		3.9		70	18	82	2	257			1
CT3/up203-AVL	Vestfjella	VF3	CT3	Luttinen & Furnes 2000	51.61	1.49	14.68	10.19	0.17	7.53	12.06	1.97	0.1	0.18	1.36	354	88	33	323		107	86	22	0.19	3.26	2	75	22	104	1	211		0.07	0.25	1.26	5.86	13.28	1.93	9.85	3.28	1.3	4.07	0.71	4.49	0.92	2.35	0.32	1.82	0.26
CT3/UP205-AVL	Vestfjella	VF3	CT3	Luttinen & Furnes 2000	53.43	2.71	13.13	12.91	0.22	4.63	9.96	2.27	0.26	0.47		66	23	32	417		157	120		0.63	11.43	4.97	184	41	284	2.7	261		0.23	0.94	3.74	17.5	37.72		24.06	6.98	2.41	7.73	1.32					3.33	0.48
CT3/up209-AVL	Vestfjella	VF3	CT3	Luttinen & Furnes 2000	49.45	1.18	12.02	11.67	0.18	13.47	9.83	1.57	0.49	0.13	1.2	1117	412	29	275		87	86	15	0.2	3.36	1.71	64	17	176	8	212		0.04	0.17	1.54	5.26	11.77	1.73	8.47	2.82	1.06	3.38	0.58	3.61	0.76	1.92	0.27	1.58	0.22
CT3/up212-AVL	Vestfjella	VF3	CT3	Luttinen & Furnes 2000	52.11	1.7	15.97	10.58	0.16	5.36	10.87	2.59	0.42	0.25	0.15	226	62	29	310		39	86	20	0.27	4.35	2.56	100	22	201	7	358		0.09	0.26	1.84	6.83	15.78	2.37	11.9	3.84	1.55	4.42	0.73	4.5	0.92	2.38	0.32	1.81	0.26
CT3/VF-100-85	Vestfjella	VF3	CT3	Luttinen & Furnes 2000	50.9895	1.81818	14.5856	12.1447	0.180814	6.55952	10.8287	2.04922	0.572577	0.27122	1.33	402	109		277	47	136	99					97	28	314	7	239
CT3/VF-101-85	Vestfjella	VF3	CT3	Luttinen & Furnes 2000	49.8796	1.38499	15.6764	11.0799	0.18065	8.37013	10.7487	1.60578	0.853071	0.220795	2.07	613	157		242	53	95	88					67	22	470	11	262
CT3/VF-102-85	Vestfjella	VF3	CT3	Luttinen & Furnes 2000	50.9096	1.61825	14.9764	11.9912	0.180923	8.13147	8.95567	1.85948	1.1559	0.221128	2.57	449	133		279	54	114	108					77	22	489	21	267
CT3/VF-103-85	Vestfjella	VF3	CT3	Luttinen & Furnes 2000	50.9734	1.62239	15.5445	11.955	0.192659	6.50984	10.5759	2.02799	0.375177	0.223078	1.94	216	67		294	46	111	109					76	25	257	4	261
CT3/VF-104-85	Vestfjella	VF3	CT3	Luttinen & Furnes 2000	51.031	1.53153	15.3053	11.3514	0.19019	6.28629	11.6917	1.99199	0.4004	0.22022	1.72	247	64		271	47	124	101					69	25	342	6	285
CT3/VF-105-85	Vestfjella	VF3	CT3	Luttinen & Furnes 2000	50.0852	1.50346	15.8164	11.737	0.210484	6.48492	10.9251	2.175	0.841936	0.220507	2.02	286	71		307	51	137	107					66	23	687	14	287
CT3/VF-106-85	Vestfjella	VF3	CT3	Luttinen & Furnes 2000	49.2876	1.42484	15.6633	10.9372	0.180614	6.17098	14.2886	1.65563	0.120409	0.270921	3.93	340	98		277	51	97	95					48	22	197	2	440
CT3/VF-107-85	Vestfjella	VF3	CT3	Luttinen & Furnes 2000	50.2756	1.62373	16.067	11.5466	0.190438	6.4348	11.0755	1.53353	1.00231	0.250576	2.6	302	98		289	53	116	105					68	24	974	14	370
CT3/VF-108-85	Vestfjella	VF3	CT3	Luttinen & Furnes 2000	51.402	1.22171	15.1813	10.5548	0.160224	8.45183	11.2157	1.20168	0.410575	0.20028	2.41	391	161		220	53	87	94					69	22	259	5	259
CT3/VF-109-85	Vestfjella	VF3	CT3	Luttinen & Furnes 2000	50.9625	1.39362	14.5077	11.3996	0.160417	8.01083	11.0989	1.71446	0.551434	0.200521	2.07	392	148		226	49	87	98					76	24	316	8	269
CT3/VF110-85	Vestfjella	VF3	CT3	Luttinen & Furnes 2000	53.69	2.455	13.3	13.03	0.204	4.41	9.76	2.32	0.5	0.338	1.59	59	16	33	411		160	119	23	0.39	6.61	4.08	142	36	371	4	247		0.24	0.78	3.23	13.16	29.06	3.92	19.48	6.16	2.21	7.35	1.25	7.63	1.55	4.01	0.54	3.18	0.48
CT3/VF111-85	Vestfjella	VF3	CT3	Luttinen & Furnes 2000	51.69	1.492	14.33	10.79	0.185	7.02	11.76	2.28	0.23	0.217	1.62	290	63	37	319		125	86	21	0.23	4.08	2.19	86	23	240	1	279		0.11	0.4	1.6	7.63	16.99	2.41	11.69	3.82	1.44	4.47	0.77	4.84	0.94	2.45	0.33	1.92	0.29
CT3/VF-124-85	Vestfjella	VF3	CT3	Luttinen & Furnes 2000	50.668	1.75791	14.5957	11.5922	0.190859	8.00603	11.1401	1.58714	0.210949	0.25113	2.76	464	174		286	51	144	96					86	23	194	2	290
CT3/VF-125-85	Vestfjella	VF3	CT3	Luttinen & Furnes 2000	48.7339	1.58762	14.8915	11.3143	0.17082	7.67685	13.2235	1.7283	0.381833	0.291399	2.52	489	188		251	52	97	99					82	21	249	3	290
CT3/VF126-85	Vestfjella	VF3	CT3	Luttinen & Furnes 2000	49.51	1.5	15.14	10.72	0.17	7.92	12.57	2.12	0.17	0.19	2.29	546	170	34	295		95	78	16	0.38	4.93	2.02	80	17	140	2	320		0.06	0.21	0.93	5.7	13.79	2.03	10.18	3.2	1.31	3.86	0.63	3.72	0.73	1.81	0.24	1.4	0.2
CT3/VF-127-85	Vestfjella	VF3	CT3	Luttinen & Furnes 2000	49.7488	1.63786	15.9264	10.8923	0.211013	6.90314	11.3143	2.67283	0.442122	0.251206	2.73	413	142		293	50	231	97					86	24	363	7	333
CT3/VF-128-85	Vestfjella	VF3	CT3	Luttinen & Furnes 2000	49.3467	1.46734	15.7688	10.603	0.180905	8.52261	11.4975	1.96985	0.462312	0.180905	2.18	493	192		248	49	95	84					67	21	274	7	308
CT3/VF129-85	Vestfjella	VF3	CT3	Luttinen & Furnes 2000	49	1.97	14.46	12.44	0.17	6.21	12.46	2.27	0.77	0.26	1.53	407	108	31	391		129	87	21	0.53	6.76	2.76	104	25	377	4	332		0.08	0.31	0.9	8.28	19.46	2.84	14.44	4.63	1.78	5.35	0.86	5.03	0.98	2.43	0.33	1.86	0.29
CT3/VF-130-85	Vestfjella	VF3	CT3	Luttinen & Furnes 2000	49.09	1.7094	13.7557	12.0965	0.180995	8.63751	12.358	1.59879	0.34188	0.231272	2.44	512	214		271	51	96	92					86	22	200	4	256
CT3/VF-132-85	Vestfjella	VF3	CT3	Luttinen & Furnes 2000	50.9016	1.40252	14.7365	10.7293	0.180325	8.98618	10.9597	1.75316	0.190343	0.160289	4.6	514	201		283	51	79	94					61	18	143	2	288
CT3/VF-133-85	Vestfjella	VF3	CT3	Luttinen & Furnes 2000	49.4444	1.49164	13.8653	11.5827	0.170187	10.892	10.932	1.33146	0.110121	0.180198	2.3	722	289		293	53	102	88					68	18	99	2	226
CT3/VF-134-85	Vestfjella	VF3	CT3	Luttinen & Furnes 2000	51.6058	1.32477	12.3545	11.5114	0.170614	11.672	9.97591	1.03372	0.170614	0.18065	3.34	1099	370		255	54	97	89					82	19	199	3	204
CT3/VF-137-85	Vestfjella	VF3	CT3	Luttinen & Furnes 2000	52.391	1.53383	14.3058	10.7669	0.180451	7.66917	9.86466	2.02506	1.03258	0.230576	2.53	486	105		274	41	101	97					82	21	610	25	336
CT3/VF-13-85	Vestfjella	VF3	CT3	Luttinen & Furnes 2000	53.4196	2.04573	14.6009	11.9334	0.190533	5.2848	9.30606	1.83514	1.13317	0.250702	2.02	162	54		307	45	132	122					132	28	669	20	380
CT3/VF-138-85	Vestfjella	VF3	CT3	Luttinen & Furnes 2000	50.1453	1.1326	11.3762	11.8372	0.170392	14.1626	9.99298	0.801844	0.180415	0.200461	3.79	1209	437		220	59	73	95					69	15	145	4	168
CT3/VF-142-85	Vestfjella	VF3	CT3	Luttinen & Furnes 2000	50.7527	1.50542	14.5223	11.8226	0.18065	7.00522	12.0534	1.85668	0.120434	0.18065	1.64	183	83		281	45	137	110					90	21	105	2	202
CT3/VF-143-85	Vestfjella	VF3	CT3	Luttinen & Furnes 2000	50.4013	1.61517	14.5867	12.2693	0.19061	6.86196	11.6774	1.9061	0.270867	0.220706	1.54	198	81		278	46	171	117					95	21	137	4	200
CT3/VF145-85	Vestfjella	VF3	CT3	Luttinen & Furnes 2000	50.87	1.8	14.75	11.4	0.197	6.69	10.75	2.59	0.66	0.299	2.35	260	75	29	340		125	95	24	0.28	4.57	2.62	94	25	351	8	252		0.1	0.32	2.38	8.38	19.27	2.76	13.47	4.41	1.65	4.97	0.86	5.38	1.06	2.65	0.37	2.12	0.32
CT3/VF146-85	Vestfjella	VF3	CT3	Luttinen & Furnes 2000	53.25	2.67	13.15	13.57	0.235	4.56	8.47	2.36	1.31	0.411	2.12	26	8	27	455		152	146	25	0.46	7.41	4.29	147	36	787	18	236		0.29	1	3.6	13.81	30.17	4.05	19.79	6.33	2.19	7.31	1.26	7.77	1.55	3.98	0.54	3.2	0.49
CT3/VF-14-85	Vestfjella	VF3	CT3	Luttinen & Furnes 2000	52.8226	2.05555	14.9804	11.9222	0.200541	5.48481	9.78642	1.87506	0.65176	0.220596	2.51	177	55		340	48	145	121					128	29	317	12	469
CT3/VF-149-85	Vestfjella	VF3	CT3	Luttinen & Furnes 2000	52.4449	1.29259	15.9619	10.0701	0.180361	6.61323	10.3808	1.90381	0.991984	0.160321	2.31	298	102		232	43	98	93					59	20	410	22	292
CT3/VF-150-85	Vestfjella	VF3	CT3	Luttinen & Furnes 2000	53.3929	1.62618	14.726	11.2427	0.190725	5.81209	8.99418	2.72034	1.13431	0.16061	1.66	190	64		317	43	104	104					73	24	686	19	275
CT3/VF-151-85	Vestfjella	VF3	CT3	Luttinen & Furnes 2000	53.5087	1.8974	13.6432	12.559	0.190744	6.57565	8.0012	2.47967	0.94368	0.200783	2.73	256	108		328	48	160	129					98	26	756	11	270
CT3/VF152-85	Vestfjella	VF3	CT3	Luttinen & Furnes 2000	51.59	1.501	14.04	11.58	0.188	7.46	10.68	2.07	0.73	0.171	1.88	324	96	30	309		97	86	19	0.2	3.4	2.31	88	23	309	6	266		0.1	0.28	1.55	6.87	15.45	2.23	10.91	3.6	1.36	4.32	0.76	4.72	0.96	2.52	0.34	2.03	0.3
CT3/VF-15-85	Vestfjella	VF3	CT3	Luttinen & Furnes 2000	53.0633	1.98536	15.1509	11.491	0.200541	5.47478	9.34523	2.17587	0.89241	0.220596	2.31	168	62		294	47	102	120					121	26	461	17	444
CT3/VF24-85	Vestfjella	VF3	CT3	Luttinen & Furnes 2000	51.06	1.87	14.42	12.06	0.18	6.18	11.02	2.63	0.28	0.3	1.1	211	65	33	352		136	101	22	0.29	4.5	2.55	96	25	235	4	306		0.1	0.37	2.22	8.49	19.27	2.75	13.56	4.25	1.58	5.23	0.85	5.25	1.03	2.67	0.36	2.11	0.32
CT3/VF-25-85	Vestfjella	VF3	CT3	Luttinen & Furnes 2000	51.7276	1.70255	14.4316	11.0966	0.18027	6.53981	11.5273	2.34352	0.2003	0.250376	2.55	251	89		286	50	125	110					75	25	219	3	375
CT3/VF-31-85	Vestfjella	VF3	CT3	Luttinen & Furnes 2000	50.3356	1.4227	15.8902	11.4317	0.200381	8.60635	9.25759	1.77337	0.851618	0.230438	3.06	268	166		252	61	123	113					70	23	362	10	335
CT3/VF-32-85	Vestfjella	VF3	CT3	Luttinen & Furnes 2000	51.0374	1.42327	15.3553	11.2058	0.200461	7.38699	9.89275	2.28526	1.03237	0.180415	2.65	271	137		250	56	105	116					68	24	444	14	426
CT3/VF34-85	Vestfjella	VF3	CT3	Luttinen & Furnes 2000	51.44	1.497	14.23	10.95	0.191	7.2	11.36	2.47	0.48	0.195	1.76	283	67	34	335		133	88	20	0.19	2.92	2.07	78	23	218	7	313		0.08	0.24	1.21	5.45	12.56	1.9	9.79	3.42	1.36	4.32	0.76	4.82	0.94	2.41	0.34	1.96	0.3
CT3/VF-35-85	Vestfjella	VF3	CT3	Luttinen & Furnes 2000	52.7202	1.48282	15.8401	11.3115	0.190362	7.23374	7.19367	2.99569	0.871656	0.160305	2.89	253	97		275	53	113	108					65	21	337	21	329
CT3/VF-37-85	Vestfjella	VF3	CT3	Luttinen & Furnes 2000	52.0108	1.85538	15.4949	12.8071	0.22064	5.69652	7.97312	2.88838	0.832414	0.22064	2.61	140	69		298	51	160	132					81	28	447	14	387
CT3/VF-38-85	Vestfjella	VF3	CT3	Luttinen & Furnes 2000	52.0791	1.58698	15.448	11.5709	0.170751	5.51426	10.5665	2.14946	0.713138	0.200884	1.09	128	67		258	44	160	97					78	24	352	10	283
CT3/VF-49-85	Vestfjella	VF3	CT3	Luttinen & Furnes 2000	52.2318	1.51121	14.9319	10.9888	0.170136	6.88551	11.239	1.67134	0.170136	0.20016	3.48	293	97		295	51	121	108					74	24	112	4	251
CT3/VF50-85	Vestfjella	VF3	CT3	Luttinen & Furnes 2000	51.24	1.44	15.07	11.39	0.18	6.47	11.52	2.3	0.2	0.19	2.68	195	66	32	311		109	89	19	0.18	2.86	1.98	77	21	93	2	276		0.07	0.22	1.26	5.17	12.19	1.81	9.3	3.27	1.32	4.14	0.72	4.47	0.9	2.31	0.32	1.9	0.29
CT3/VF-54-85	Vestfjella	VF3	CT3	Luttinen & Furnes 2000	54.9699	2.24449	13.517	12.1643	0.170341	4.75952	8.52705	2.11423	1.28257	0.250501	1.67	72	79		343	46	127	112					120	27	323	26	328
CT3/VF-59-85	Vestfjella	VF3	CT3	Luttinen & Furnes 2000	51.914	1.67789	14.2269	12.4385	0.210992	6.91249	9.46448	2.62232	0.331558	0.200944	3	210	92		283	54	128	112					71	24	125	9	380
CT3/VF-60-85	Vestfjella	VF3	CT3	Luttinen & Furnes 2000	52.0446	1.6377	14.8397	11.8457	0.210992	6.16899	9.89651	2.43143	0.703306	0.221039	3.58	205	75		320	52	141	106					80	25	558	14	257
CT3/VF-61-85	Vestfjella	VF3	CT3	Luttinen & Furnes 2000	52.4115	1.67452	14.7799	11.6114	0.200541	6.67803	9.95688	1.98536	0.501354	0.200541	2.62	193	74		284	51	82	108					67	22	179	11	434
CT3/VF-62-85	Vestfjella	VF3	CT3	Luttinen & Furnes 2000	52.8622	1.55388	14.8872	11.2982	0.210526	6.33584	9.49373	2.39599	0.781955	0.180451	2.84	177	75		286	48	123	98					59	23	358	20	477
CT3/VF63-85	Vestfjella	VF3	CT3	Luttinen & Furnes 2000	51.43	1.638	15.16	11.34	0.194	6.82	9.9	2.6	0.7	0.207	2.45	191	59	30	349		126	92	21	0.21	3.46	2.31	90	25	398	14	424		0.11	0.36	1.47	6.43	14.7	2.16	10.91	3.79	1.49	4.66	0.83	5.15	1	2.61	0.36	2.12	0.32
CT3/VF-64-85	Vestfjella	VF3	CT3	Luttinen & Furnes 2000	51.422	1.46205	16.2027	11.1156	0.220308	7.12998	9.27298	1.97276	0.981374	0.220308	3.19	154	83		303	53	135	99					60	22	297	27	435
CT3/VF-65-85	Vestfjella	VF3	CT3	Luttinen & Furnes 2000	50.9171	1.45334	16.6483	11.6267	0.210484	7.15646	8.95059	2.16498	0.711637	0.160369	3.63	166	95		298	55	120	98					55	21	403	20	436
CT3/VF-84-85	Vestfjella	VF3	CT3	Luttinen & Furnes 2000	51.2528	1.44317	15.3438	11.375	0.180397	6.53438	11.4051	1.76388	0.501102	0.200441	2.3	338	106		265	49	100	99					65	22	282	9	259
CT3/VF-85-85	Vestfjella	VF3	CT3	Luttinen & Furnes 2000	51.3633	1.52366	14.8356	11.5577	0.200481	6.75621	9.91379	1.71411	1.9146	0.220529	2.62	315	86		301	50	95	102					71	26	992	40	287
CT3/VF-86-85	Vestfjella	VF3	CT3	Luttinen & Furnes 2000	53.2284	1.66433	14.1568	11.921	0.180469	5.74494	10.8081	1.76459	0.33086	0.200521	1.51	232	64		280	43	118	94					74	24	238	6	274
CT3/VF-87-85	Vestfjella	VF3	CT3	Luttinen & Furnes 2000	52.016	1.69509	14.2026	11.8756	0.190572	6.0682	10.4313	2.33701	0.982949	0.200602	2.48	295	65		329	49	121	110					75	27	597	16	328
CT3/VF88-85	Vestfjella	VF3	CT3	Luttinen & Furnes 2000	50.89	1.43	14.89	10.31	0.18	8.09	11.34	2.02	0.67	0.18	2.22	408	141	30	301		56	86	15	0.19	3.23	2.12	76	23.75	249	6.7	295		0.07	0.25	1.12	6.49	14.94	2.08	10.35	3.29	1.31	4.09	0.71	4.58	0.96	2.39	0.32	1.9	0.29
CT3/VF-88-85	Vestfjella	VF3	CT3	Luttinen & Furnes 2000	50.9169	1.39293	14.6508	11.2336	0.160337	8.01684	11.3739	1.5232	0.531115	0.200421	2.22	396	154		255	51	65	94					76	23	271	6	263
CT3/VF89-85	Vestfjella	VF3	CT3	Luttinen & Furnes 2000	53.32	2.19	14.01	13.31	0.2	4.22	9.6	2.37	0.47	0.32	1.67	67	19	32	378		156	113	25	0.35	5.97	3.71	136	33	289	5	289		0.21	0.72	3.57	11.92	26.31	3.64	17.68	5.56	1.95	6.6	1.1	6.8	1.36	3.6	0.48	2.95	0.44
CT3/VF-90-85	Vestfjella	VF3	CT3	Luttinen & Furnes 2000	50	1.15439	14.4549	11.5439	0.180687	7.1572	13.0195	1.48565	0.853242	0.150572	2.76	346	84		266	54	77	98					58	20	614	13	225
CT3/VF91-85	Vestfjella	VF3	CT3	Luttinen & Furnes 2000	50.86	1.166	14.34	10.75	0.185	7.4	12.99	2	0.18	0.124	1.46	284	65	31	290		142	81	18	0.15	2.48	1.73	64	19	149	0	215		0.08	0.3	1.03	4.77	10.4	1.61	7.87	2.83	1.14	3.59	0.63	3.9	0.76	1.97	0.27	1.62	0.24
CT3/VF-92-85	Vestfjella	VF3	CT3	Luttinen & Furnes 2000	52.0044	1.59351	15.0832	11.7158	0.190419	5.85288	10.6434	2.0445	0.621367	0.250551	2.87	206	66		284	48	139	102					73	24	416	15	381
CT3/VF-93-85	Vestfjella	VF3	CT3	Luttinen & Furnes 2000	54.4744	1.42299	13.7789	11.0833	0.1904	6.60387	9.17928	2.39503	0.67141	0.200421	2.63	338	77		277	46	103	95					81	22	384	9	213
CT3/VF-94-85	Vestfjella	VF3	CT3	Luttinen & Furnes 2000	51.9471	1.48163	14.7462	11.2824	0.180198	6.91761	10.1612	1.86205	1.17129	0.250275	2.58	333	78		291	50	109	206					81	23	878	20	280
CT3/VF-95-85	Vestfjella	VF3	CT3	Luttinen & Furnes 2000	53.1457	1.53276	13.6746	11.0198	0.190343	5.85053	10.2084	1.59287	2.51453	0.270487	2.02	294	88		274	44	84	85					80	24	1140	34	275
CT3/VF-96-85	Vestfjella	VF3	CT3	Luttinen & Furnes 2000	50.3311	1.51485	14.8375	11.5169	0.160514	7.54414	12.1188	1.35433	0.351124	0.270867	1.84	426	144		256	53	85	110					77	21	183	6	253
CT3/VF-97-85	Vestfjella	VF3	CT3	Luttinen & Furnes 2000	49.9298	1.61484	14.4534	12.3872	0.180542	8.87663	10.5015	1.35406	0.471414	0.230692	2.59	429	166		268	59	101	114					82	22	210	7	198
CT3/VF-98-85	Vestfjella	VF3	CT3	Luttinen & Furnes 2000	51.2506	1.52687	15.3189	11.0799	0.190859	6.9111	10.3064	2.00904	1.1552	0.25113	2.17	357	104		283	49	88	106					73	23	909	18	268
CT3/VF-99-85	Vestfjella	VF3	CT3	Luttinen & Furnes 2000	49.2877	1.29414	12.6404	12.2091	0.200642	12.5803	10.3732	0.922953	0.260835	0.230738	3.39	815	374		229	69	94	99					72	19	180	4	153
254-AVL-92	Björnnutane	VF3	BN1	Luttinen et al. 2010	50.6428	1.71077	14.6033	11.2669	0.164893	7.06979	11.223	2.88563	0.216422	0.216422	1.56	297	110		326		148	94	21		8		85	23	168	6	337
256-AVL-92	Björnnutane	VF3	BN1	Luttinen et al. 2010	50.0438	1.69813	13.8613	12.0858	0.173905	7.60068	11.713	2.46536	0.132986	0.225054	0.88	326	121		285		145	87	21		7		88	23	223	4	333
Z.1610.10	Björnnutane	VF3	BN1	Luttinen et al. 2010	48.4202	1.98426	15.1812	11.7896	0.188977	7.40161	12.231	2.41471	0.16798	0.220474	3.03	298	109		300		126	94	21		7		97	22	208	6	377
Z.1610.11	Björnnutane	VF3	BN1	Luttinen et al. 2010	49.0106	1.81973	14.9746	11.4434	0.182989	7.39073	11.7621	2.68384	0.477805	0.254152	0.01	266	104		319		132	89	21		7		108	23	245	13	331
Z.1610.12	Björnnutane	VF3	BN1	Luttinen et al. 2010	49.6489	1.47813	15.004	10.9681	0.182235	7.78548	12.0984	2.50067	0.212607	0.12149	0.42	264	104		325		124	84	22		2		80	19	129	7	248
Z.1610.14	Björnnutane	VF3	BN1	Luttinen et al. 2010	50.0411	1.69562	14.5966	11.3785	0.173647	7.39534	11.5629	2.48214	0.531157	0.143004	0.72	255	95	29.122	321		135	88	22	0.197	3	2.673	101	23	175	12	234	0.005	0.164	0.811	2.075	7.274	17.799	2.765	13.981	3.932	1.389	4.841	0.779	4.467	0.871	2.173	0.316	1.849	0.294
Z.1610.3	Björnnutane	VF3	BN1	Luttinen et al. 2010	48.8862	1.56502	14.9192	11.7103	0.175035	8.0619	12.1186	2.27545	0.144146	0.144146	1.5	292	98	30.827	286		112	84	19	0.183	2	1.923	76	19	116	7	330	0.017	0.066	0.233	0.905	4.827	12.944	2.145	11.135	3.244	1.235	4.035	0.648	3.767	0.734	1.874	0.277	1.635	0.26
Z.1610.4	Björnnutane	VF3	BN1	Luttinen et al. 2010	49.2918	1.58117	14.6692	11.7399	0.18362	7.89567	11.9251	2.30545	0.265229	0.142816	0.61	290	99		280		122	81	21		4		78	18	134	8	331
Z.1610.5	Björnnutane	VF3	BN1	Luttinen et al. 2010	49.4317	1.57849	14.4141	11.8952	0.197311	7.8613	11.8283	2.35735	0.290775	0.145387	1.98	273	99		269		118	76	20		3		75	19	177	7	326
Z.1610.6	Björnnutane	VF3	BN1	Luttinen et al. 2010	49.5958	1.546	14.0274	11.8985	0.18552	7.91553	11.9351	2.41176	0.340121	0.144294	1.18	296	97		287		108	85	20		4		76	20	156	8	325
Z.1610.7	Björnnutane	VF3	BN1	Luttinen et al. 2010	47.608	1.93469	14.9159	12.8036	0.208032	7.53074	12.2843	2.30915	0.156024	0.249638	2.07	318	139	30.728	324		150	101	20	0.246	4	2.535	100	24	219	6	330	0.003	0.091	0.316	1.734	7.937	19.806	3.14	15.966	4.188	1.563	4.988	0.789	4.482	0.866	2.228	0.321	1.915	0.294
Z310.2	Björnnutane	VF3	BN1	Luttinen et al. 2010
Z372.1	Björnnutane	VF3	BN1	Luttinen et al. 2010
255-AVL-92	Björnnutane	VF1	BN2	Luttinen et al. 2010	52.2819	1.25878	15.98	10.1362	0.160014	5.47247	11.809	2.43221	0.298693	0.170681	4.79	157	77	26.742	232		74	94	19	0.246	8	2.425	86	20	282	11	308	0.575	0.294	1.362	3.796	10.632	23.738	3.333	15.257	3.66	1.277	4.125	0.654	3.755	0.737	1.911	0.282	1.737	0.282
Z.1610.8	Björnnutane	VF1	BN2	Luttinen et al. 2010	51.5146	1.44224	15.9053	10.8754	0.172663	6.2565	10.2887	2.62042	0.731279	0.192976	0.8	176	94		231		114	89	19		5		113	23	389	23	307
Z.1610.9	Björnnutane	VF1	BN2	Luttinen et al. 2010	51.7009	1.4414	15.5503	11.0858	0.168338	5.82872	9.98457	3.25103	0.799607	0.189381	3.56	175	73	28.215	266		106	94	22	0.291	4	2.787	110	22	344	20	323	0.081	0.351	1.662	4.142	12.631	27.739	3.889	17.562	4.253	1.405	4.719	0.749	4.266	0.847	2.24	0.327	2.042	0.323
Z308.4	Björnnutane	VF1	BN2	Luttinen et al. 2010
15-SKV-00	Vestfjella	UP	UP	Luttinen & Vuori 2004	50.15	0.86	13.47	9.66	0.16	13.81	9.34	1.92	0.5	0.13		1213	338	37.29	189		29	76	11	0.24	3.91	1.6	59	16.24	135	8.42	191		0.16	0.87	2.01	6.59	13.18	1.66	7.37	2.13	0.87	2.54	0.45	2.88	0.62	1.74	0.26	1.65	0.26
14-SKV-00	Vestfjella	UP	UP	Luttinen & Vuori 2004	50.49	0.86	13.39	9.86	0.17	13.26	9.42	1.92	0.47	0.18		1083	312	40.04	201		52	77	11	0.24	4	1.59	58	16.22	135	8.25	198		0.15	0.91	2	6.31	12.69	1.6	7.16	2.09	0.89	2.57	0.45	2.91	0.62	1.72	0.25	1.58	0.26
6-1a-SKV-00	Vestfjella	UP	UP	Luttinen & Vuori 2004	51.62	1.06	18.19	6.56	0.12	7.68	11.48	2.54	0.63	0.13		681	146	32.85	184		47	53		0.28	4.79	1.88	69	18.86	169	12.12	231		0.19	1.05	2.54	7.96	15.97	1.98	8.81	2.5	1.03	2.99	0.52	3.3	0.73	1.98	0.29	1.85	0.29
60a-MHR-94	Vestfjella	UP	UP	Luttinen & Vuori 2004	50.4	1	13.11	8.69	0.16	13.59	8.84	1.85	0.61	0.12		1104	350	31	201		40	75	15	0.27	4.85	1.78	70	17.29	151	10.1	196		0.15	0.74	2.3	8.06	15.45	1.97	8.51	2.43	0.95	2.8	0.49	3.14	0.66	1.85	0.27	1.69	0.26
Z.1609.1	Sembberget	KW	SB1	Luttinen et al. 2010	50.311	1.67668	13.8353	13.2555	0.200358	6.08456	10.6295	3.18464	0.664345	0.158177	3.27	122	62	34.43	306		122	104	18	0.261	4	3.019	115	30	139	33	188	0.589	0.218	1.37	3.441	10.023	22.712	3.296	15.842	4.272	1.414	5.154	0.855	5.093	1.041	2.744	0.413	2.536	0.403
Z.1609.11	Sembberget	KW	SB1	Luttinen et al. 2010	49.215	1.64118	15.0357	12.9971	0.275229	6.77879	10.7033	2.64016	0.519877	0.19368	1.03	126	73		321		147	104	23		3		118	35	214	14	168
Z.1609.12	Sembberget	KW	SB1	Luttinen et al. 2010	50.4174	1.65354	14.5942	13.3075	0.205408	5.99792	10.558	2.49571	0.575143	0.195138	0.73	105	54		245		176	102	23		4		109	33	188	18	168
Z.1609.2	Sembberget	KW	SB1	Luttinen et al. 2010	51.9329	1.58738	13.9484	12.5508	0.194582	6.23686	10.3743	2.55005	0.471093	0.153617	0.58	146	68	35.842	288		135	95	21	0.265	4	3.065	117	29	210	11	188	0.017	0.249	1.371	2.869	9.859	22.483	3.283	15.736	4.281	1.421	5.189	0.864	5.152	1.065	2.793	0.42	2.573	0.411
Z.1609.20	Sembberget	KW	SB1	Luttinen et al. 2010	50.8822	1.60412	14.2123	13.1835	0.214563	5.98734	10.6362	2.53389	0.561952	0.183912	0.35	112	51		279		122	101	23		4		107	34	196	18	166
Z.1609.21	Sembberget	KW	SB1	Luttinen et al. 2010	51.0743	1.57407	14.3426	13.0639	0.21747	5.83026	10.6974	2.48537	0.538496	0.176047	1.71	107	50	38.793	274		137	90	21	0.309	3	2.958	108	32	181	15	167	0.074	0.253	1.178	2.364	8.783	20.042	2.981	14.489	4.094	1.341	5.253	0.894	5.475	1.153	3.115	0.48	2.997	0.485
Z.1609.22	Sembberget	KW	SB1	Luttinen et al. 2010	51.2262	1.57054	15.3485	12.4066	0.203967	5.84364	10.2391	2.4578	0.530313	0.173372	0.52	139	59		283		104	100	23		5		116	31	202	15	177
Z.1609.23	Sembberget	KW	SB1	Luttinen et al. 2010	51.3434	1.6131	15.1304	12.3926	0.19398	5.52332	10.332	2.5932	0.694244	0.18377	0.72	135	60	35.492	262		177	101	22	0.345	4	3.3	123	34	202	23	186	0.085	0.294	1.441	2.705	10.424	23.587	3.609	16.54	4.416	1.444	5.702	0.937	5.704	1.209	3.237	0.493	3.182	0.494
Z.1609.24	Sembberget	KW	SB1	Luttinen et al. 2010	50.173	1.66499	15.4925	12.8622	0.223352	5.5838	10.3453	2.60916	0.852799	0.192895	0.48	137	61		298		150	108	22		3		121	35	224	23	178
Z.1609.25	Sembberget	KW	SB1	Luttinen et al. 2010	51.2002	2.02947	13.5263	14.6182	0.216339	4.9861	9.66315	2.61667	0.88596	0.257547	1.14	85	34	40.153	271		143	109	21	0.425	6	4.068	150	44	301	28	178	0.166	0.387	1.835	3.948	13.52	30.017	4.343	20.367	5.399	1.678	6.908	1.151	7.029	1.48	4.052	0.629	3.917	0.641
Z.1609.26	Sembberget	KW	SB1	Luttinen et al. 2010	50.4034	1.60572	14.8554	12.8671	0.212076	6.1401	10.5331	2.50451	0.686722	0.191878	0.11	163	64	37.689	290		114	103	20	0.301	4	3.005	116	35	190	24	167	0.129	0.245	1.171	2.271	9.304	21.145	3.27	15.283	4.203	1.369	5.413	0.913	5.609	1.184	3.156	0.495	3.052	0.49
Z.1609.27	Sembberget	KW	SB1	Luttinen et al. 2010	51.0701	1.68709	14.4013	12.6473	0.213427	6.14873	10.6409	2.52047	0.47767	0.193101	0.64	151	57		287		104	100	18		4		119	35	214	12	170
Z.1609.28	Sembberget	KW	SB1	Luttinen et al. 2010	49.4279	1.4811	14.8519	12.8398	0.194075	7.12971	11.43	2.28804	0.214504	0.143003	0.95	179	97	38.038	279		157	98	20	0.224	3	2.537	94	29	118	8	156	0.015	0.172	0.943	1.837	6.805	16.021	2.474	12.53	3.647	1.258	4.789	0.811	5.006	1.024	2.821	0.436	2.635	0.422
Z.1609.9	Sembberget	KW	SB1	Luttinen et al. 2010	49.7579	1.51091	14.8233	12.796	0.214386	6.73784	11.1379	2.40929	0.459398	0.153133	0.82	154	79	38.313	281		138	87	19	0.265	2	2.713	100	31	145	15	159	0.049	0.235	1.056	2.042	7.859	18.288	2.76	13.583	3.895	1.29	4.969	0.864	5.246	1.086	2.946	0.447	2.788	0.448
Z349.1	Sembberget	KW	SB1	Luttinen et al. 2010
Z.1609.3	Sembberget	KW 2	SB2	Luttinen et al. 2010	51.5025	1.28756	15.7598	10.983	0.185409	6.56142	10.6816	2.45152	0.442922	0.144207	1.41	132	97	33.631	229		101	89	19	0.352	5	3.87	145	33	292	22	158	0.199	0.362	2.541	5.679	14.292	30.913	4.299	19.156	4.595	1.33	5.444	0.9	5.485	1.138	3.136	0.488	3.07	0.498
Z.1609.4	Sembberget	KW 2	SB2	Luttinen et al. 2010	50.9565	1.19862	15.7459	11.1078	0.174158	7.04827	10.808	2.19234	0.635164	0.13318	0.74	165	104	35.557	258		104	90	19	0.31	5	3.588	132	31	307	12	145	0.013	0.426	2.555	5.495	13.289	28.958	4.021	17.852	4.323	1.253	5.137	0.866	5.34	1.129	3.105	0.476	3.027	0.496
Z.1609.5	Sembberget	KW 2	SB2	Luttinen et al. 2010	50.6537	1.20875	15.7447	11.1831	0.185961	7.33512	10.9717	2.13855	0.44424	0.134305	2.37	139	93		243		115	83	21		3		109	29	231	16	163
Z.1609.6	Sembberget	KW 2	SB2	Luttinen et al. 2010	50.7857	1.21869	15.7099	11.2607	0.18434	6.9742	10.7225	2.24281	0.768084	0.133135	1.18	145	90		216		117	79	18		4		113	30	261	22	170
Z.1609.7	Sembberget	KW 2	SB2	Luttinen et al. 2010	49.2774	1.19677	16.7757	11.3447	0.251951	6.91816	11.2013	2.11009	0.787347	0.136473	4.3	149	99	33.475	255		127	88	20	0.287	4	2.927	108	29	103	34	132	0.629	0.303	1.797	3.744	10.557	23.495	3.289	14.905	3.796	1.171	4.588	0.794	4.868	1.016	2.819	0.434	2.759	0.438
Z.1609.8	Sembberget	KW 2	SB2	Luttinen et al. 2010	49.5408	1.26682	15.9494	11.894	0.186907	7.09209	11.2352	2.09751	0.591873	0.145372	2.36	148	98		267		133	102	22		3		117	32	146	25	153
Z.1610.13	Björnnutane	KW 2	SB2	Luttinen et al. 2010	49.4292	1.31592	15.8322	12.1829	0.267296	6.74409	10.733	2.50847	0.82245	0.16449	0.97	154	67	37.66	282		137	105	19	0.325	3	2.759	107	29	253	19	177	0.048	0.338	1.674	3.72	11.22	24.258	3.356	15.355	3.852	1.24	4.818	0.8	4.987	1.035	2.841	0.44	2.803	0.464
Z350.2	Sembberget	KW	SB2	Luttinen et al. 2010
KWH/TUR1	Kirwanveggen	KW	Kirwan	Harris et al. 1990	51.1207	1.27701	15.1214	12.0285	0.182429	5.85801	10.6822	3.05062	0.496613	0.182429	-0.13	113	71	34	269						3.3		92	27	124	11	184					8	20.4		11.3	3.48	1.25	3.81		4.19		2.26		2.34	0.36
KWH/TUR4	Kirwanveggen	KW	Kirwan	Harris et al. 1990	52.3322	1.64267	14.0641	12.462	0.192659	5.8913	9.86615	2.8189	0.557696	0.172379	0.44	137	107	30	285								112	28	118	16	235					10	20		16
KWH/LAG9	Kirwanveggen	KW	Kirwan	Harris et al. 1990	51.1253	1.35848	14.487	12.5203	0.172344	5.91038	10.7563	2.89943	0.567721	0.202758	-0.28	156	74	35	282						4		108	34	154	12	173					8.58	20.1		12.2	3.82	1.26	4.27		4.6		2.56		2.66	0.44
KWH/LAG12	Kirwanveggen	KW	Kirwan	Harris et al. 1990	51.2227	1.56266	14.7336	13.1507	0.202943	5.15474	10.0355	3.09488	0.639269	0.202943	-0.04	95	51	34	291						4		115	34	167	16	176					12	21		16
KWH/LAG22	Kirwanveggen	KW	Kirwan	Harris et al. 1990	51.7207	1.44964	14.9019	12.3324	0.243296	5.19031	10.1069	3.18312	0.648789	0.223021	-0.09	86	55	31	265						3.6		117	32	175	15	190					9.84	22.6		14.8	4.34	1.21	4.57		5.21		2.8		2.99	0.44
KWH/LAG23	Kirwanveggen	KW	Kirwan	Harris et al. 1990	51.3726	1.43969	14.9343	12.5438	0.192635	5.70807	10.4226	2.64619	0.547488	0.192635	0.16	96	63	33	251						4.1		105	29	144	10	194					8.9	21		12.7	3.85	1.26	4.31		4.62		2.48		2.58	0.36
KWH/LAG26	Kirwanveggen	KW	Kirwan	Harris et al. 1990	51.9067	1.66329	13.9757	12.8093	0.162272	5.89249	10.1623	2.59635	0.598377	0.233266	2.13	114	67	32	306						6.3		132	36	170	16	208					8.1	19		15
KWH/LAG28	Kirwanveggen	KW	Kirwan	Harris et al. 1990	50.696	1.28871	14.6426	13.0476	0.213094	6.13913	10.6953	2.72963	0.405893	0.142063	0.62	85	66	35	257						3.9		92	29	121	5.8	151					6.4	15		14
KWH/LAG29	Kirwanveggen	KW	Kirwan	Harris et al. 1990	50.7964	1.27828	14.5785	12.9857	0.162321	6.10733	10.8451	2.6783	0.405803	0.162321	0.53	89	69	35	257						3.7		91	29	120	5.8	151					7.9	21		14
KWH/LAG31	Kirwanveggen	KW	Kirwan	Harris et al. 1990	50.8457	1.54078	15.4281	12.0945	0.192597	5.91984	10.5523	2.93965	0.314238	0.172324	0.19	134	90	31	278						3		98	28	108	2.5	227					7.88	18.7		12.6	3.79	1.23	4.08		4.43		2.21		2.23	0.32
KWH/LAG32	Kirwanveggen	KW	Kirwan	Harris et al. 1990	51.1817	1.39974	14.4639	12.7092	0.213003	5.96409	10.498	2.8299	0.557866	0.182574	0.04	129	48	37	272						3.3		109	33	158	12	169					7.8	23		17
KWH/LAG34	Kirwanveggen	KW	Kirwan	Harris et al. 1990	50.0609	1.83644	14.9756	13.0175	0.192776	6.09781	10.2374	2.73945	0.618912	0.223214	0.83	180	127	29	298						5.1		130	33	142	11	254					13	27		21
KWH/LAG35	Kirwanveggen	KW	Kirwan	Harris et al. 1990	51.6126	1.4503	15.213	12.7688	0.192698	5.13185	10.3955	2.57606	0.446247	0.212982	0.65	87	53	34	231						4.9		119	33	173	5.5	182					12	25		18
KWH/LAG36	Kirwanveggen	KW	Kirwan	Harris et al. 1990	51.7395	1.47074	14.8088	12.6991	0.20286	5.32508	9.83873	3.0429	0.689725	0.182574	0.17	81	53	35	253						3.9		116	34	177	16	172					12	25		18
KWH/LAG52	Kirwanveggen	KW	Kirwan	Harris et al. 1990	51.895	1.4694	14.9574	12.1403	0.172274	5.39116	10.1642	3.00973	0.608026	0.192542	-0.04	109	78	32	265						5		106	29	137	14	204					11	22		16
KWH/LAG54	Kirwanveggen	KW	Kirwan	Harris et al. 1990	50.7655	1.39917	15.036	12.2884	0.192639	6.24556	11.0413	2.31167	0.537362	0.1825	1.13	158	85	35	281						4.5		102	31	134	8.4	165					8.2	14		16
KWH/LAG56	Kirwanveggen	KW	Kirwan	Harris et al. 1990	51.5674	1.65365	14.2843	13.006	0.213047	6.13777	9.77985	2.33337	0.781171	0.243482	0.59	123	64	37	268						3.8		124	35	153	19	175					9.48	23		15	4.48	1.32	4.92		5.46		2.88		2.88	0.43
KWH/LAG57	Kirwanveggen	KW	Kirwan	Harris et al. 1990	50.7806	1.49027	14.6087	12.5811	0.19262	6.59976	10.4826	2.47364	0.577859	0.212895	1.17	158	73	40	287						3.6		107	31	150	11	156					9.2	26		18
KWH/LAG59	Kirwanveggen	KW	Kirwan	Harris et al. 1990	51.7856	1.72484	14.0219	13.119	0.142045	5.46874	9.96346	2.8612	0.689934	0.223214	2.97	127	71	34	295						5.3		133	34	168	17	210					11	26		18
KWH/LAD7	Kirwanveggen	KW	Kirwan	Harris et al. 1990	51.2611	1.36872	14.7315	12.3614	0.192635	5.7689	10.5239	3.07202	0.517072	0.202773	0.02	143	64	36	293						3.9		108	32	159	8.9	168					7.69	18.9		11.9	3.65	1.22	3.97		4.59		2.46		2.72	0.4
KWH/LAD22	Kirwanveggen	KW	Kirwan	Harris et al. 1990	50.9128	1.44016	14.8377	12.8398	0.25355	5.84178	10.7505	2.64706	0.294118	0.182556	0.48	131	62	34	271						5.4		111	33	166	11	168					8.95	21.4		12.8	3.98	1.36	4.56		4.91		2.64		2.91	0.44
KWH/LAD28	Kirwanveggen	KW	Kirwan	Harris et al. 1990	51.4758	1.46059	14.9711	12.8918	0.213003	5.20337	10.143	2.93133	0.497008	0.213003	0	97	67	24	296						5.3		109	31	112	3.3	216					7.6	22		15
KWH/URF2	Kirwanveggen	KW	Kirwan	Harris et al. 1990	51.4758	1.46059	14.9711	12.8918	0.213003	5.20337	10.143	2.93133	0.497008	0.213003	0.58	80	55	33	265						4.3		122	34	200	6.6	200					9.67	22.9		14	4.13	1.3	4.43		5.08		2.78		2.94	0.44
KWH/URF7	Kirwanveggen	KW	Kirwan	Harris et al. 1990	50.2955	1.1242	15.6275	11.5828	0.192431	6.42113	11.6269	2.63327	0.344351	0.15192	0.56	188	98	33	269						2.6		76	24	92	5.3	152					9.1	14		11
KWH/URF10	Kirwanveggen	KW	Kirwan	Harris et al. 1990	50.1268	1.62255	15.7793	12.5444	0.233242	5.95274	10.4553	2.76848	0.354934	0.162255	1.02	132	104	32	297						4.7		106	30	107	6.9	225					8.1	21		18
KWH/URF13	Kirwanveggen	KW	Kirwan	Harris et al. 1990	50.4052	1.13452	15.782	11.639	0.182334	6.38169	11.7605	2.27917	0.28363	0.151945	0.9	189	101	32	268						2.3		77	25	92	3.2	159					5.96	15.8		9.35	3.02	1.02	3.46		3.75		2.05		2.12	0.28
KWH/URF14	Kirwanveggen	KW	Kirwan	Harris et al. 1990	50.5428	1.43046	14.7712	12.8944	0.223192	6.14792	11.0378	2.45511	0.334787	0.162321	1.2	145	100	32	281						3.4		93	28	96	5.8	176					9.5	17		12
Harris, C., Marsh, J.S., Duncan, A.R. & Erlank, A.J. 1990. The petrogenesis of the Kirwan Basalts of Dronning Maud Land, Antarctica. Journal of Petrology, 31, 341–369, https://doi.org/10.1093/petrology/31.2.341
Heinonen, J.S. & Luttinen, A.V. 2008. Jurassic dikes of Vestfjella, western Dronning Maud Land, Antarctica: geochemical tracing of ferropicrite sources. Lithos, 105, 347–364, https ://doi.org/10.1016/j.lithos.2008.05.010
Heinonen, J.S., Carlson, R.W. & Luttinen, A.V. 2010. Isotopic (Sr, Nd, Pb, and Os) composition of highly magnesian dikes of Vestfjella, western Dronning Maud Land, Antarctica: a key to the origins of the Jurassic Karoo large igneous province? Chemical Geology, 277, 227–244, https://doi.org/10.1016/j.chemgeo.2010.08.004
Heinonen, J.S., Carlson, R.W., Riley, T.R., Luttinen, A.V. & Horan, M.F. 2014. Subduction-modified oceanic crust mixed with a depleted mantle reservoir in the sources of the Karoo continental flood basalt province. Earth and Planetary Science Letters, 394, 229–241, https://doi.org/10.1016/j.epsl.2014.03.012
Luttinen, A.V. & Furnes, H. 2000. Flood basalts of Vestfjella: Jurassic magmatism across an Archaean-Proterozoic lithospheric boundary in Dronning Maud Land, Antarctica. Journal of Petrology, 41, 1271–1305, https://doi.org/10.1093/petrology/41.8.1271
Luttinen, A.V. & Vuori, S.K. 2006. Geochemical correlations between Jurassic gabbros and basaltic rocks in Vestfjella, Dronning Maud Land, Antarctica. In: Hanski, E., Mertanen, S., Rämö, T. & Vuollo, J. (eds) Dyke Swarms – Time Markers of Crustal Evolution. Taylor Francis Group, London, 201–2012, doi: 10.1201/NOE0415398992.ch14
Luttinen, A.V., Rämö, O.T. & Huhma, H. 1998. Neodymium and strontium isotopic and trace element composition of a Mesozoic CFB suite from Dronning Maud Land, Antarctica: implications for lithosphere and asthenosphere contributions to Karoo magmatism. Geochimica et Cosmochimica Acta, 62, 2701–2714, https://doi.org/10.1016/S0016-7037(98)00184-7
Luttinen, A.V., Leat, P.T. & Furnes, H. 2010. Björnnutane and Sembberget basalt lavas and the geochemical provinciality of Karoo magmatism in western Dronning Maud Land, Antarctica. Journal of Volcanology and Geothermal Research, 198, 1–18, doi:10.1016/j.jvolgeores.2010.07.011
Luttinen, A.V., Heinonen, J.S., Kurhila, M., Jourdan, F., Mänttäri, I., Vuori, S.K. & Huhma, H. 2015. Depleted Mantle-sourced CFB magmatism in the jurassic Africa–Antarctica Rift: petrology and 40Ar/39Ar and U/Pb chronology of the Vestfjella Dyke Swarm, Dronning Maud Land, Antarctica. Journal of Petrology, 56, 919–952, https://doi.org/10.1093/petrology/egv022
Riley, T.R., Leat, P.T., Curtis, M.L., Millar, I.L. & Fazel, A. 2005. Early-Middle Jurassic dolerite dykes from western Dronning Maud Land (Antarctica): identifying mantle sources in the Karoo large igneous province. Journal of Petrology, 46, 1489–1524, https://doi.org/10.1093/petrology/egi023
[truncated: 21 more columns]
